# Supplementary material for: Structural Determination of Lysosphingomyelin-509 and Discovery of Novel Class Lipids from Patients with Niemann–Pick Disease Type C
Source: PubMed Central journal article supplement (PMC6829288; doi:10.3390/ijms20205018), 2019-10-10
Supplement: ijms-20-05018-s001.pdf [file ijms-20-05018-s001.pdf]

### Confirmation of the peak of Lyso-SM-509

Serum samples

- Patients with NPC
- Healthy controls

SRM  
( $m/z$  509>184)

Finding the target peak

“Lyso-SM-509”

- ✓ Increased in patients with NPC

### Investigation of partial structure of Lyso-SM-509

Lyso-SM-509  
in the serum of  
patients with NPC

HR-MS

Speculated Formula  $C_{24}H_{50}N_2O_7P^+$   
( $\Delta m/z$  from theoretical mass = -0.1mDa, 0.196 ppm)

Acetylation

Not reacted.  
Have NO hydroxy group.

Methylation

Reacted.  
HAVE a carboxy group.

NBD-derivatization

Not reacted.  
Have NO amino group.

HAD-MS/MS

Partial structure of *O*-phosphocholine-serine  
*N*-Acyl-*O*-phosphocholine-serine

The structure of Lyso-SM-509 was speculated as *N*-palmitoyl-*O*-phosphocholine-serine.

**A**

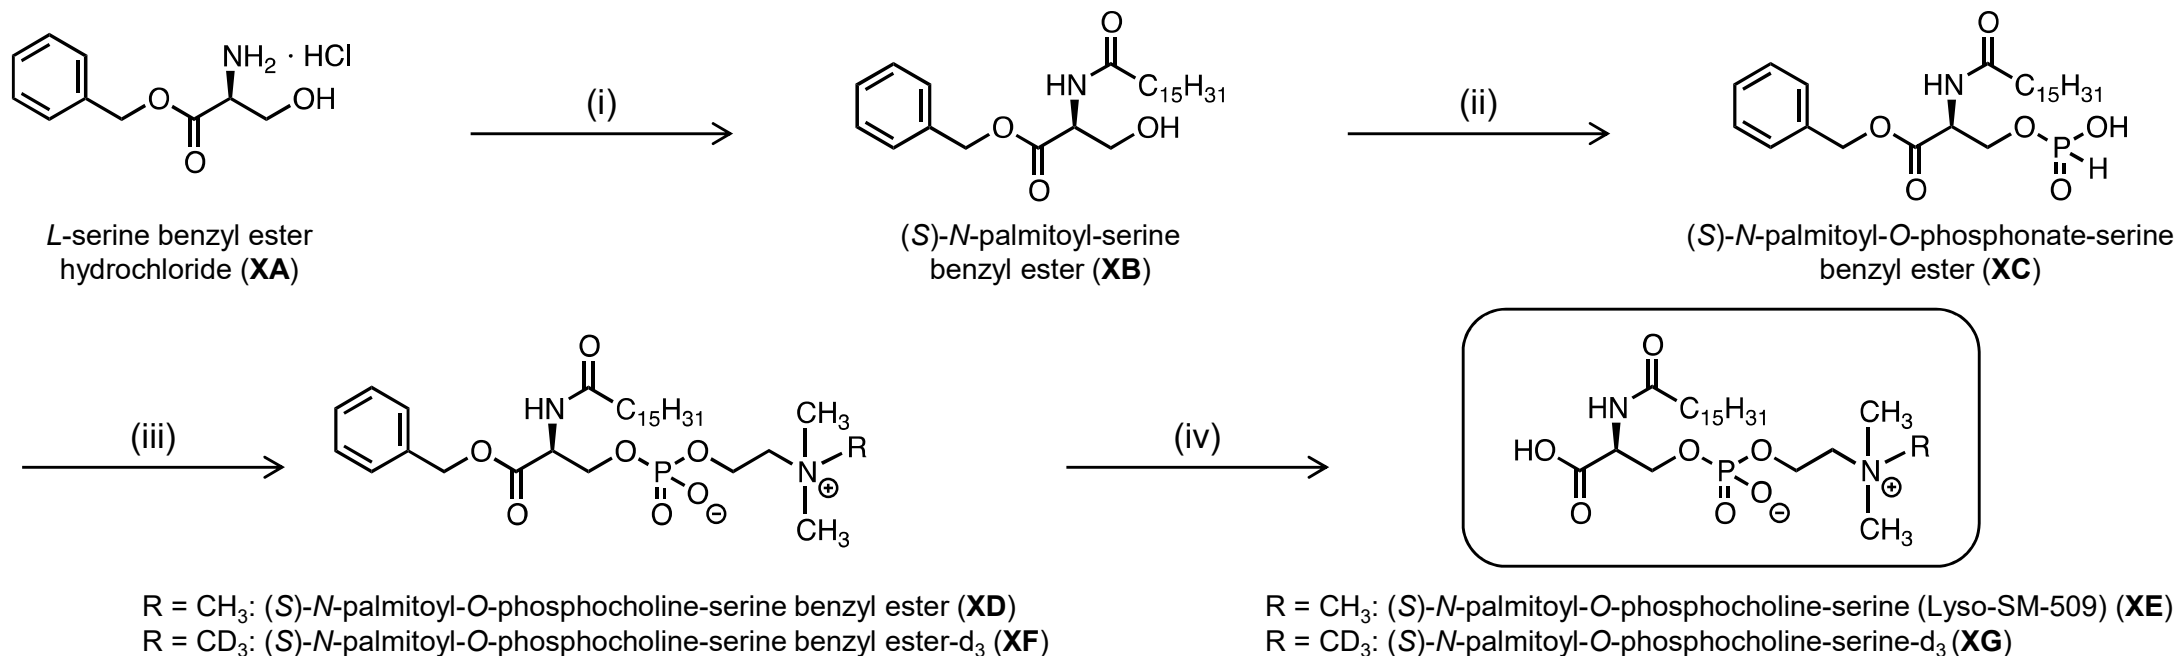

Synthesis of (*S*)-*N*-palmitoyl-*O*-phosphocholine-serine and (*S*)-*N*-palmitoyl-*O*-phosphocholine-serine-*d*<sub>3</sub>.

Reagents and conditions: (i) palmitic acid, DCC, HOBT, NMM, CH<sub>2</sub>Cl<sub>2</sub>, rt, 4 hr; (ii) PCl<sub>3</sub>, Imidazole, Et<sub>3</sub>N, CH<sub>3</sub>CN, toluene, rt, 7 hr; (iii) (a) choline tosylate or choline tosylate-*d*<sub>3</sub>, pyridine, rt, 15 min, (b) I<sub>2</sub>, pyridine, H<sub>2</sub>O, rt, 5 min; (iv) Pd/C, H<sub>2</sub>, AcOEt, rt, 6 hr

**B**

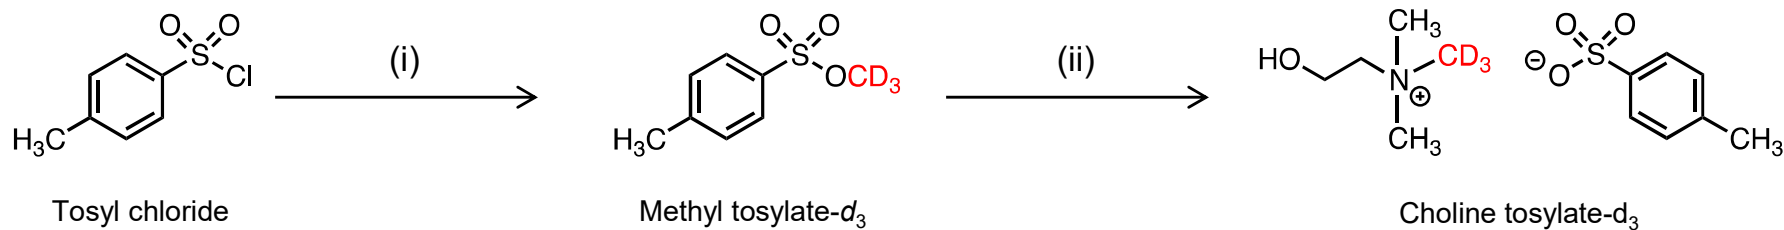

Synthesis of choline tosylate-*d*<sub>3</sub>.

Reagents and conditions: (i) CD<sub>3</sub>OD, NaOH, H<sub>2</sub>O, THF, rt, 10 hr; (ii) N,N-dimethylaminoethanol, THF, rt, 24 hr

A

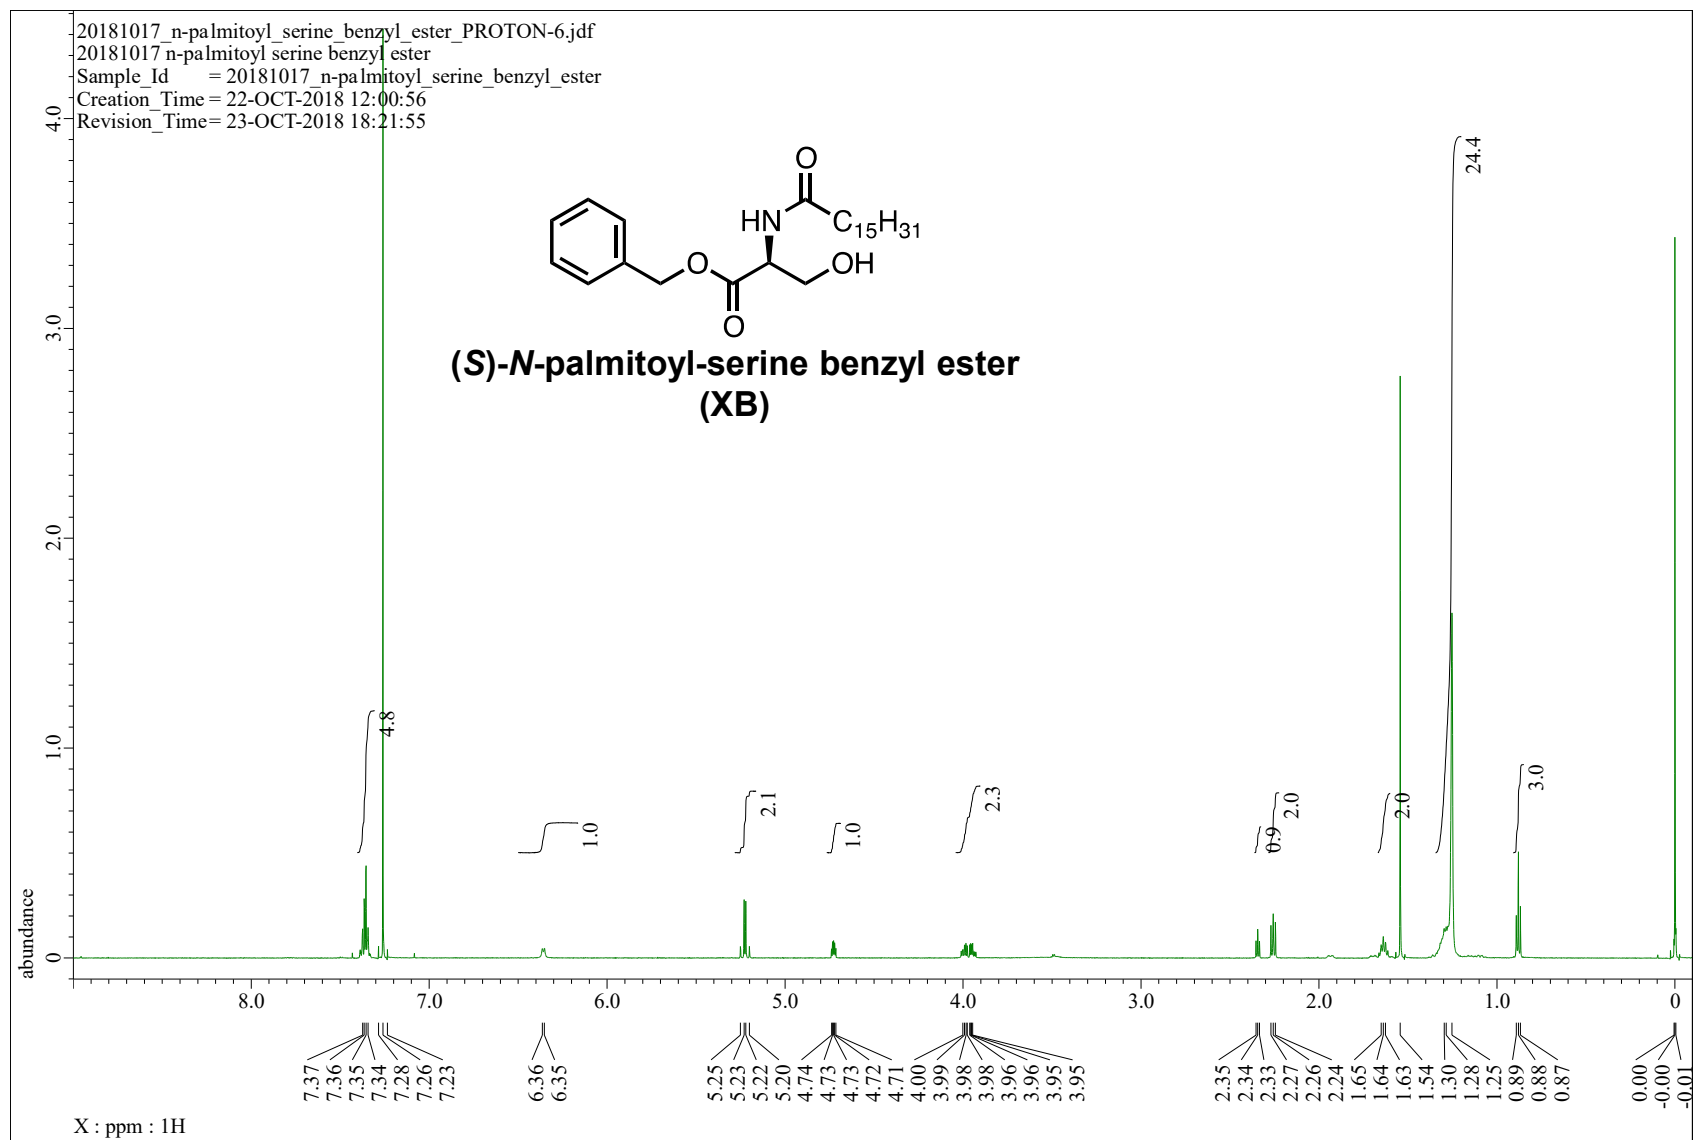

Fig. S3 NMR spectrum of synthesized compounds.

a, <sup>1</sup>H-NMR spectrum of (S)-N-palmitoyl-serine benzyl ester (XB) in CDCl<sub>3</sub>

$\delta$  : 0.87–0.89 (t, 3H, J = 6.9 Hz, -CH<sub>3</sub>), 1.25–1.30 (m, 24H, palmitoyl methylene proton), 1.63–1.65 (m, 2H, NHCO-CH<sub>2</sub>-CH<sub>2</sub>), 2.24–2.27 (t, 2H, J = 7.6 Hz, NHCO-CH<sub>2</sub>), 2.33–2.35 (t, 1H, J = 5.8 Hz, -OH), 3.93–4.01 (m, 2H, COC(N)H-CH<sub>2</sub>OH), 4.71–4.74 (m (quint), 1H, J = 3.4 Hz, CO-CH-N), 5.20–5.25 (dd, 2H, J = 17.9, 12.4 Hz, PhCH<sub>2</sub>O-CO-), 6.35–6.36 (d, 1H, J = 6.9 Hz, C-NH-CO-), 7.23–7.37 (m, 5H, Ph).

B

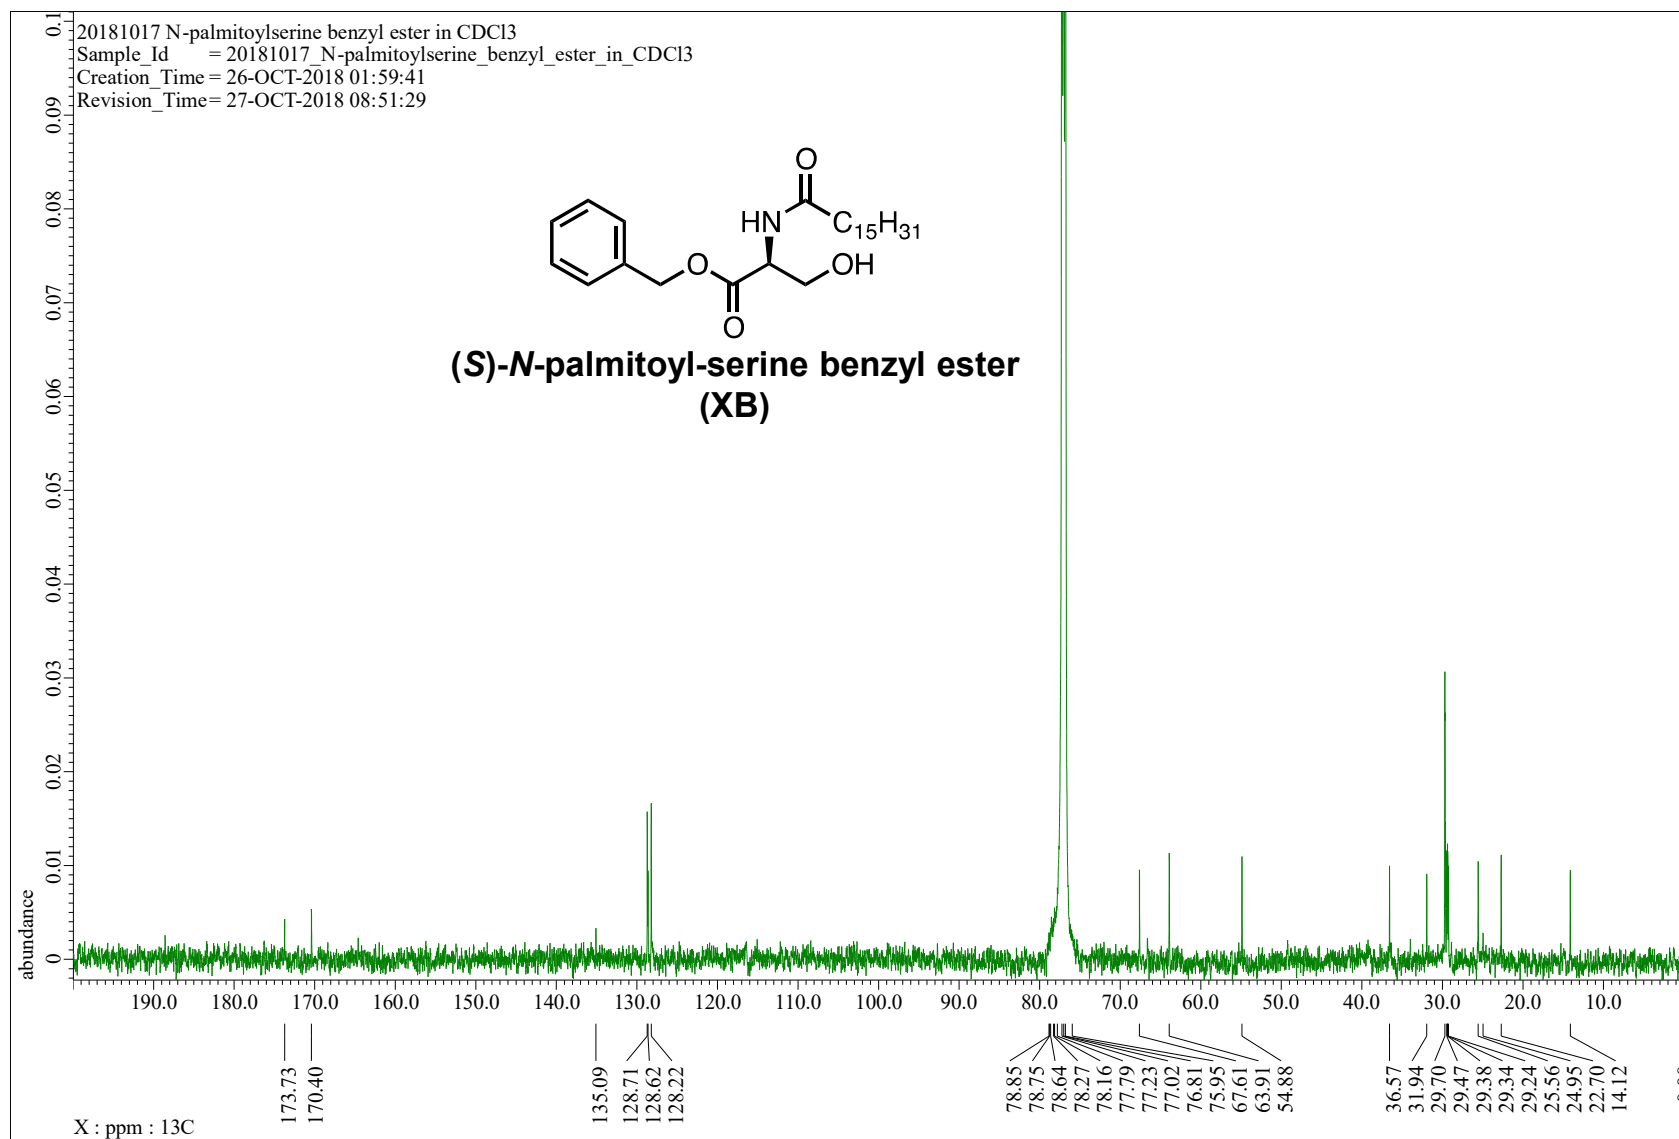

Fig. S3(continued).

b, <sup>13</sup>C-NMR spectrum of (S)-N-palmitoyl-serine benzyl ester (XB) in CDCl<sub>3</sub>.

δ: 14.1 (-CH<sub>3</sub>), 22.7 (-CH<sub>2</sub>CH<sub>3</sub>), 25.6 (-NHCOCH<sub>2</sub>CH<sub>2</sub>-), 29.2–29.7 (multiple peaks in the range), 31.9 (-CH<sub>2</sub>CH<sub>2</sub>CH<sub>3</sub>), 36.6 (-NHCOCH<sub>2</sub>-), 54.9 (-NHCH-), 63.9 (-NHCH(-COO)CH<sub>2</sub>OH), 67.6 (-Bn), 128.2 (Ph), 128.6 (Ph), 128.7 (Ph), 135.1 (quaternary carbon in Ph), 170.4 (BnOCO-), 173.7 (-NHCO-).

C

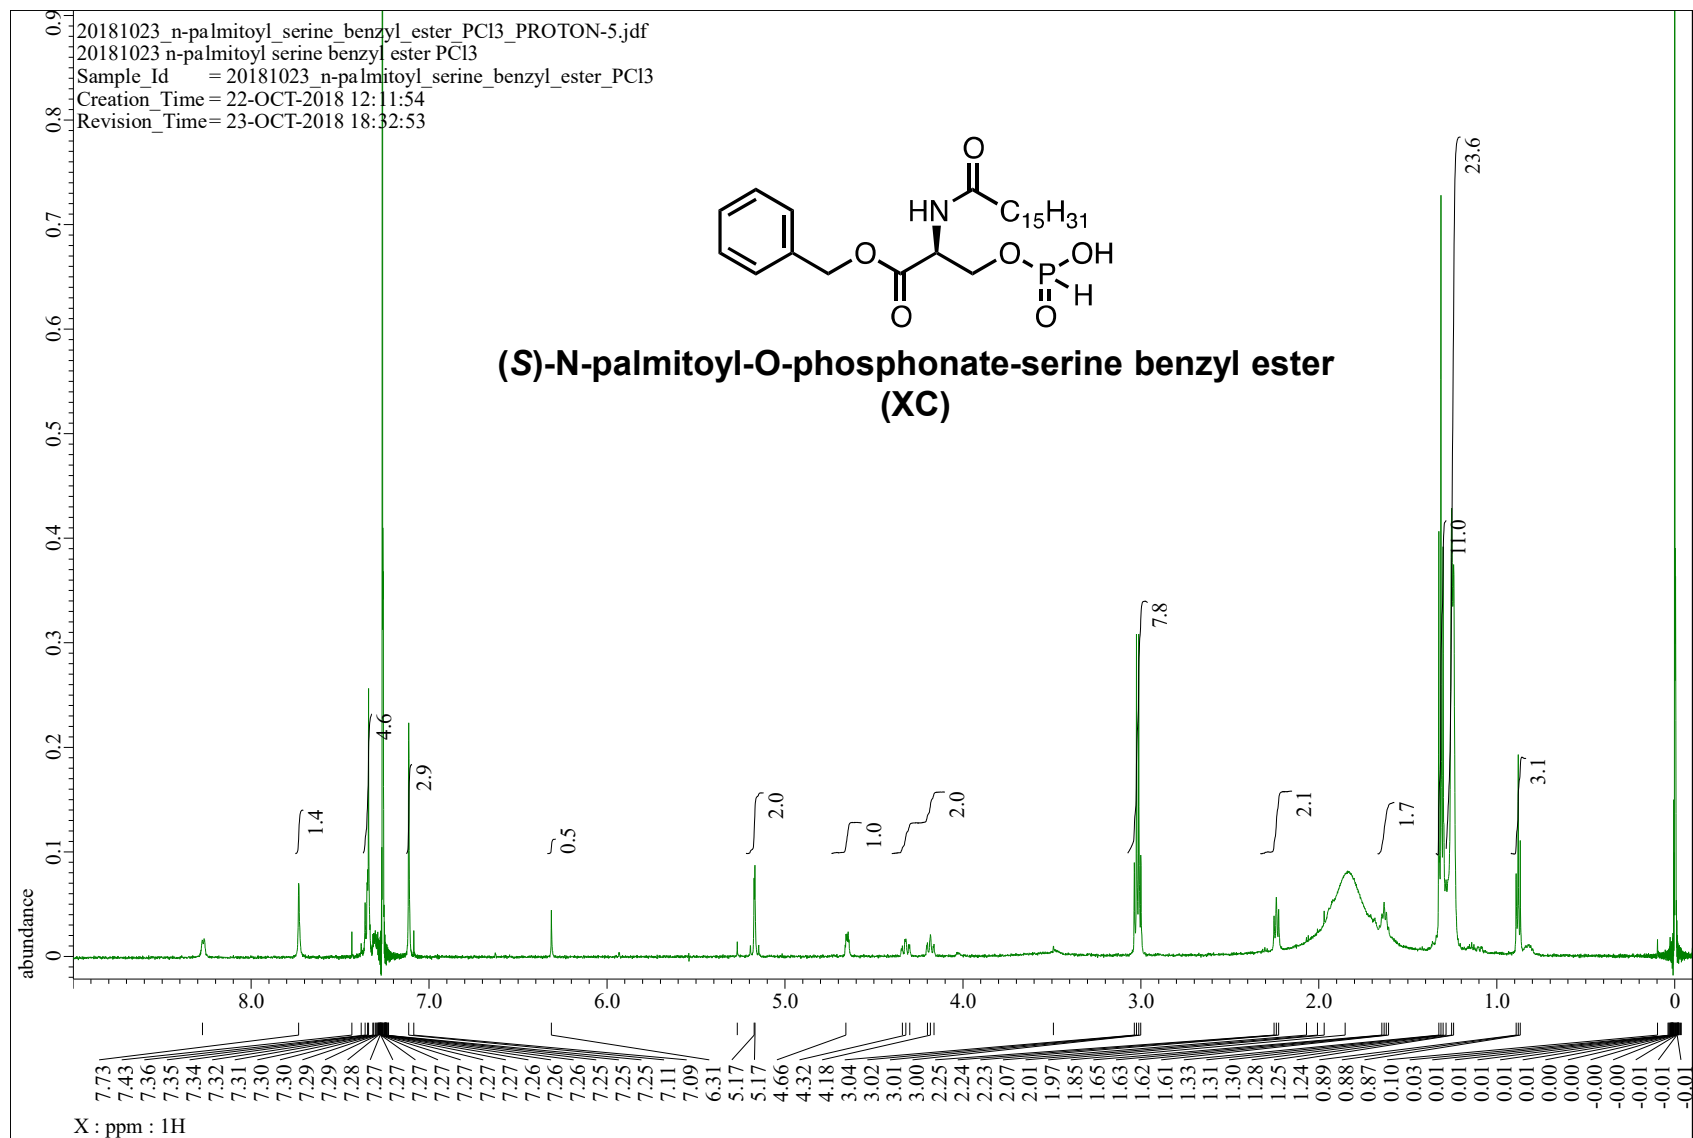

Fig. S3 (continued)

c, <sup>1</sup>H-NMR spectrum of (S)-N-palmitoyl-O-phosphonate-serine benzyl ester (XC) in CDCl<sub>3</sub>.

δ: 0.87–0.89 (t, 3H, J = 6.9 Hz, -CH<sub>3</sub>), 1.24–1.33 (m, 24H, palmitoyl), 1.61–1.66 (m, 2H, NCO-CH<sub>2</sub>-CH<sub>2</sub>), 2.23–2.25 (t, 2H, J = 7.6 Hz, NCO-CH<sub>2</sub>), 4.16–4.35 (m, 2H, COCH(-NH)CH<sub>2</sub>OH), 4.66 (s, 1H, COCHN), 5.17 (dd, 2H, J = 12.7, 15.5 Hz, Bn-CH<sub>2</sub>-OCO), 6.31 (s, 1H, NH), 7.34–7.36 (m, 5H, Bn).

D

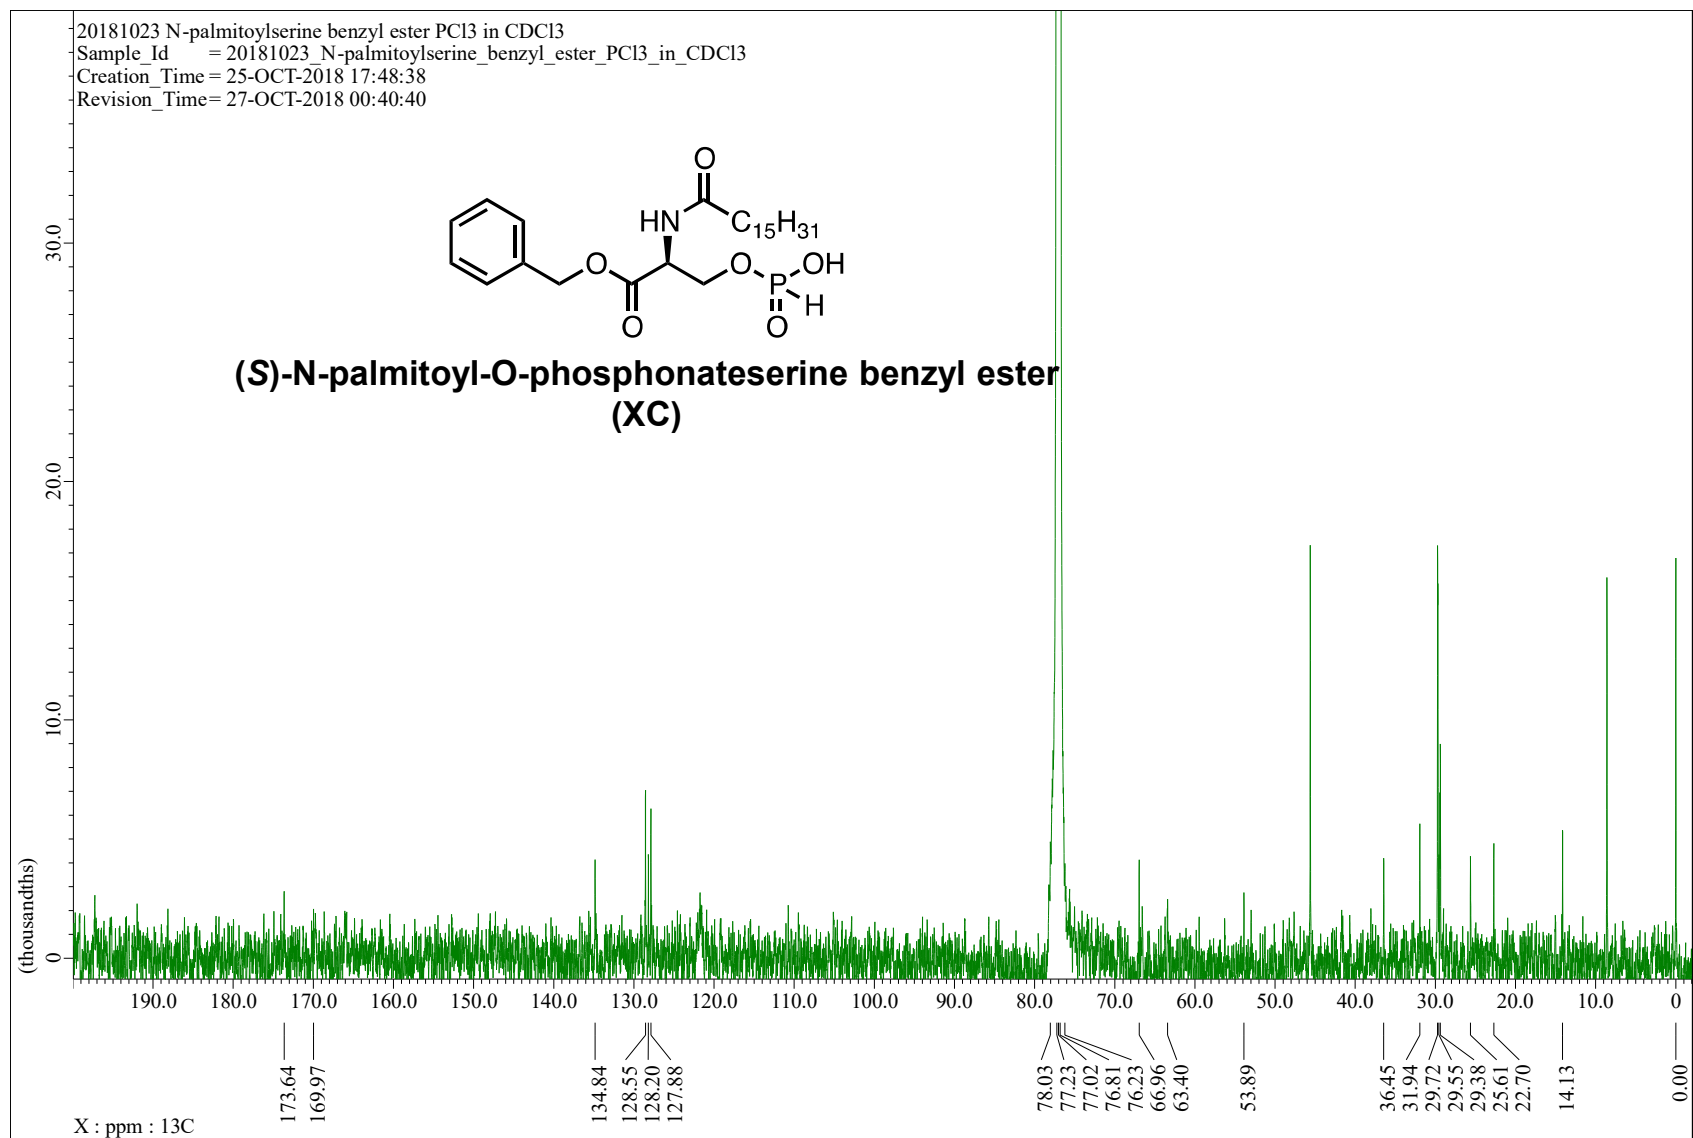

Fig. S3(continued)

d,  $^{13}\text{C}$ -NMR spectrum of (S)-N-palmitoyl-O-phosphonateserine benzyl ester (XC) in  $\text{CDCl}_3$ .

$\delta$ : 14.1 (- $\text{CH}_3$ ), 22.7 (- $\text{CH}_2\text{CH}_3$ ), 25.6 (- $\text{NHCOCH}_2\text{CH}_2$ -), 29.4–29.7 (multiple peaks in the range), 31.9 (- $\text{CH}_2\text{CH}_2\text{CH}_3$ ), 36.5 (- $\text{NHCOCH}_2$ -), 53.9 (- $\text{NHCH}$ -), 63.4 (- $\text{NHCH}(\text{COO})\text{CH}_2\text{OH}$ ), 67.0 ( $\text{BnCH}_2$ -), 127.9 (Ph), 128.2 (Ph), 128.6 (Ph), 134.8 (quaternary carbon in Ph), 170.0 ( $\text{BnOCO}$ -), 173.6 (- $\text{NHCO}$ -).

E

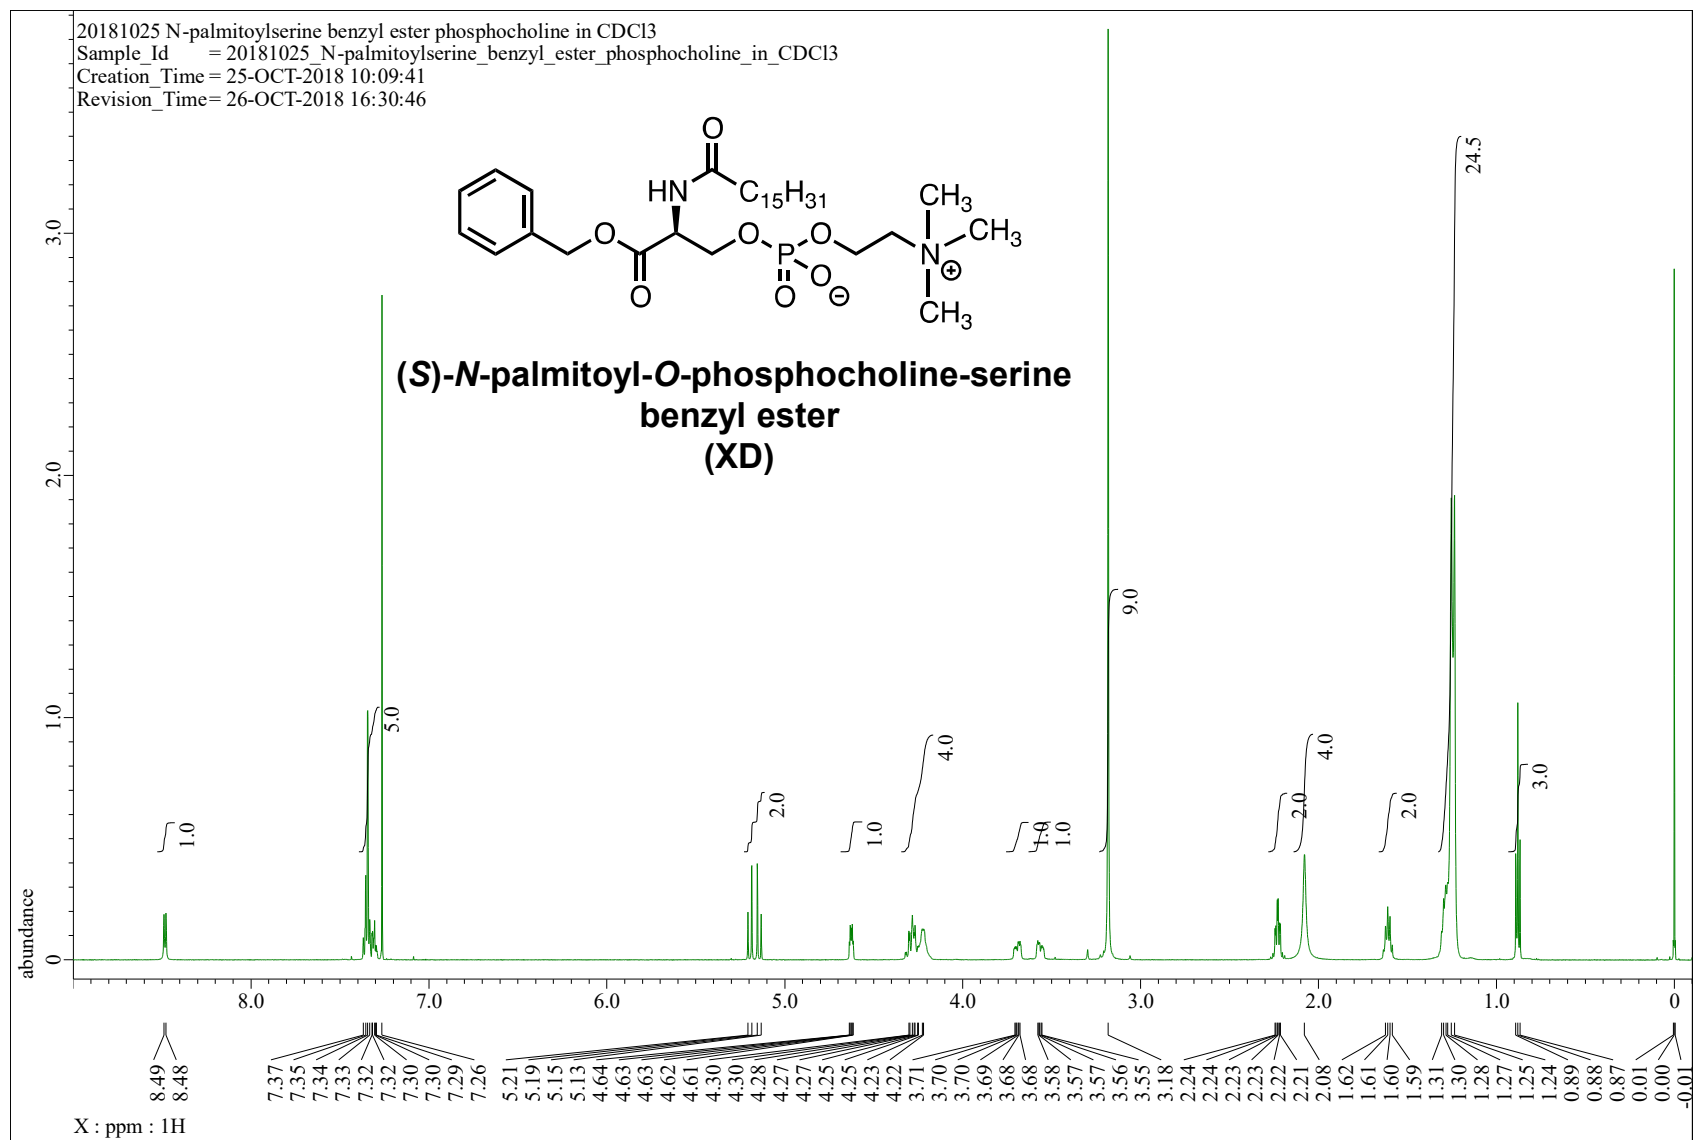

Fig. S3 (continued)

e, <sup>1</sup>H-NMR NMR spectrum of (S)-N-palmitoyl-O-phosphocholine-serine benzyl ester (XD) in CDCl<sub>3</sub>.

δ: 0.88 (t, 3H, J = 6.9 Hz, -CH<sub>3</sub>), 1.24–1.31 (m, 24H, palmitoyl), 1.60 (m, 2H, NCO-CH<sub>2</sub>-CH<sub>2</sub>), 2.19–2.27 (m, 2H, NCO-CH<sub>2</sub>), 3.18 (s, 9H, -N(CH<sub>3</sub>)<sub>3</sub>), 3.56 (qd, 1H, J = 6.6, 2.7 Hz, -POCH<sub>2</sub>CH<sub>2</sub>N), 3.69 (qd, 1H, J = 6.6, 2.7 Hz, -POCH<sub>2</sub>CH<sub>2</sub>N), 4.22–4.30 (m, 4H, -CH<sub>2</sub>OPOCH<sub>2</sub>-), 4.61–4.64 (m, 1H, -COCHN-), 5.17 (dd, J = 31.6, 13.1 Hz, 2H, Bn-CH<sub>2</sub>-OCO), 7.29–7.37 (m, 5H), 8.48 (d, 1H, J = 6.9 Hz, NH);

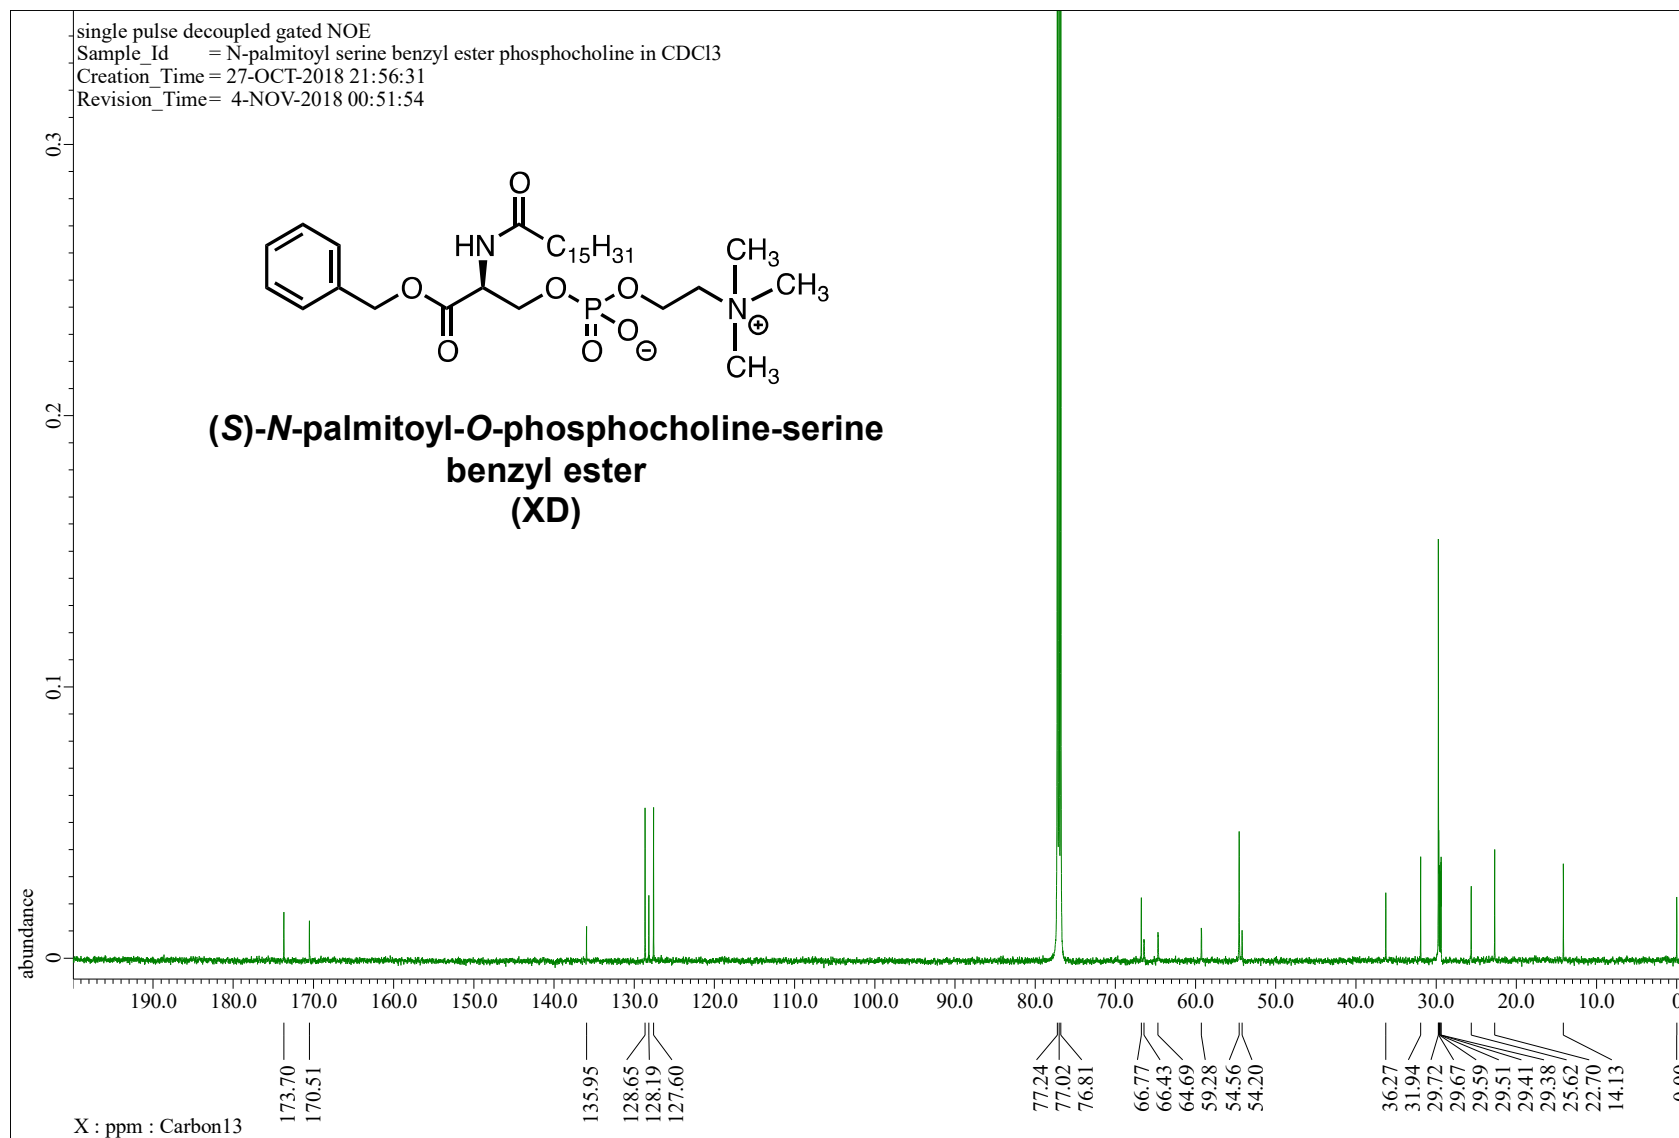

Fig. S3(continued)

f, <sup>13</sup>C-NMR NMR spectrum of (S)-N-palmitoyl-O-phosphocholineserine benzyl ester (XD) in CDCl<sub>3</sub>.

δ: 14.13 (-CH<sub>3</sub>), 22.70 (-CH<sub>2</sub>CH<sub>3</sub>), 25.62 (-NHCOCH<sub>2</sub>CH<sub>2</sub>-), 29.4–29.7 (multiple peaks in the range), 31.9 (-CH<sub>2</sub>CH<sub>2</sub>CH<sub>3</sub>), 36.3 (-NHCOCH<sub>2</sub>-), 54.2 (-NHCH-), 54.6 (-N(CH<sub>3</sub>)<sub>3</sub>), 59.3 (-POCH<sub>2</sub>CH<sub>2</sub>-), 64.7 (-CHCH<sub>2</sub>OP-), 66.4 (-POCH<sub>2</sub>CH<sub>2</sub>N-), 66.8 (BnCH<sub>2</sub>-), 127.6 (Ph), 128.2 (Ph), 128.7 (Ph), 136.0 (quaternary carbon in Ph), 170.5 (BnOCO-), 173.7 (-NHCO-).



G

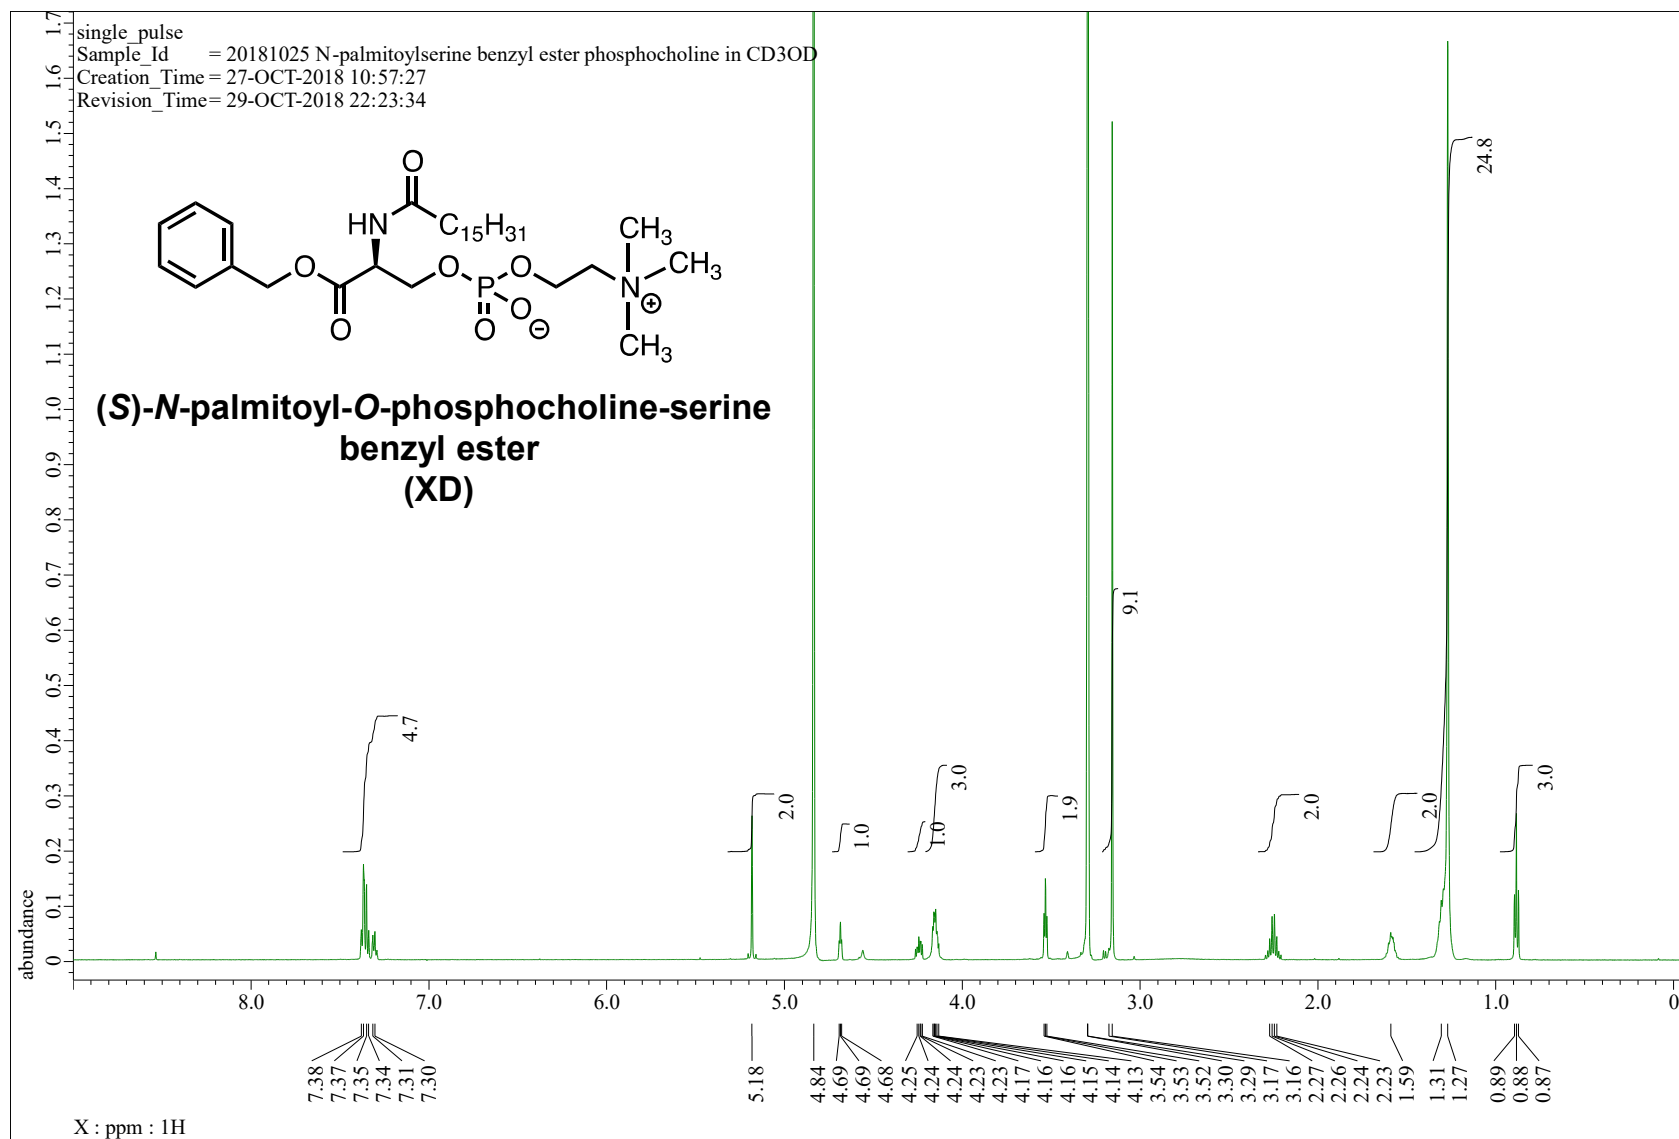

Fig. S3(continued)

g, <sup>1</sup>H-NMR NMR spectrum of (S)-N-palmitoyl-O-phosphocholineserine benzyl ester (XD) in CD<sub>3</sub>OD.

δ : 0.88 (t, 3H, J = 6.9 Hz, -CH<sub>3</sub>), 1.27–1.32 (m, 25H, palmitoyl), 1.55–1.62 (m, 2H, NCO-CH<sub>2</sub>-CH<sub>2</sub>), 2.25 (qd, J = 14.8, 7.7 Hz, 2H, NCO-CH<sub>2</sub>), 3.16 (s, 9H, -N(CH<sub>3</sub>)<sub>3</sub>), 3.53 (t, J = 4.8 Hz, 2H, -POCH<sub>2</sub>CH<sub>2</sub>N), 4.13–4.18 (m, 3H, -CH<sub>2</sub>OPOCH<sub>2</sub>CH<sub>2</sub>N-), 4.23–4.26 (m, 1H, -POCH<sub>2</sub>CH<sub>2</sub>N-), 4.69 (t, J = 4.1 Hz, 1H, -COCHN-), 5.18 (t, J = 13.1 Hz, 2H, Bn-CH<sub>2</sub>-OCO), 7.29–7.38 (m, 5H);

H

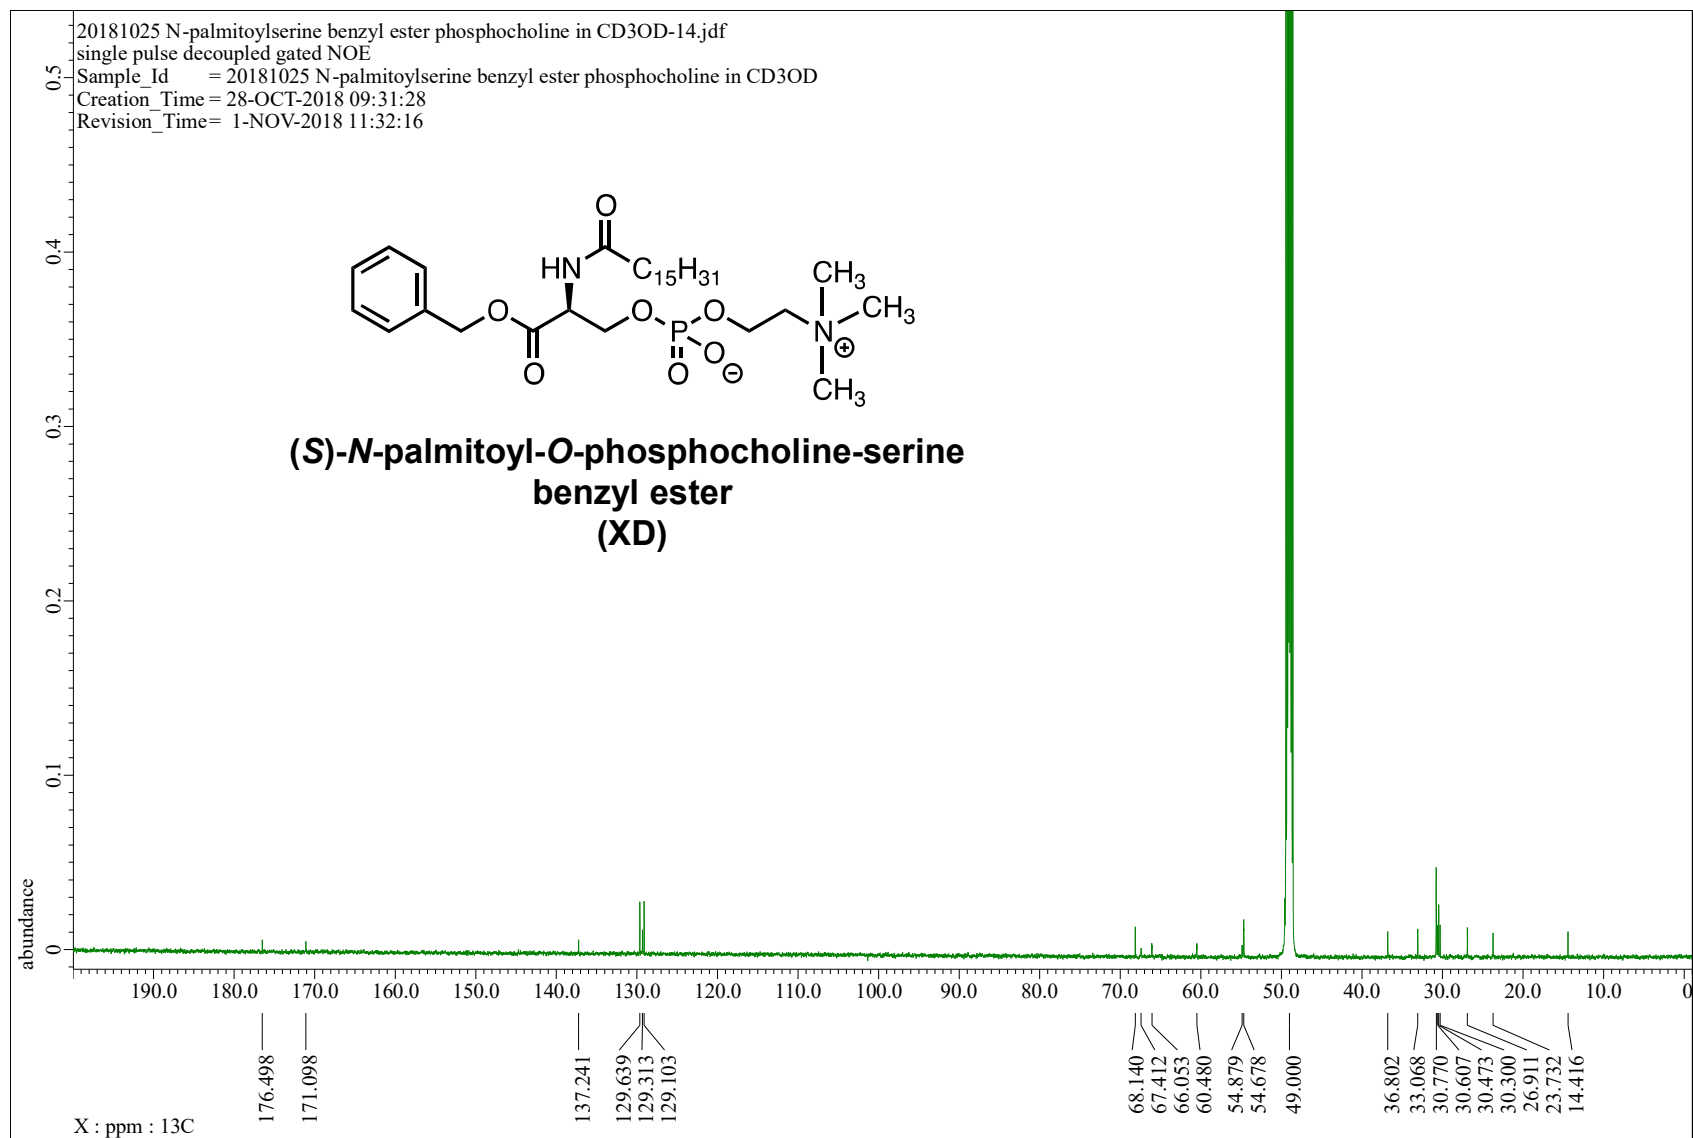

Fig. S3(continued)

h,  $^{13}\text{C}$ -NMR spectrum of (S)-N-palmitoyl-O-phosphocholineserine benzyl ester (XD) in  $\text{CD}_3\text{OD}$ .

$\delta$ : 14.4 (- $\text{CH}_3$ ), 23.7 (- $\text{CH}_2\text{CH}_3$ ), 26.9 (- $\text{NHCOCH}_2\text{CH}_2$ -), 30.3–30.8 (multiple peaks in the range), 33.07 (- $\text{CH}_2\text{CH}_2\text{CH}_3$ ), 36.8 (- $\text{NHCOCH}_2$ -), 54.7 (- $\text{NHCH}$ -), 54.9 (- $\text{N}(\text{CH}_3)_3$ ), 60.48 (- $\text{POCH}_2\text{CH}_2$ -), 66.1(- $\text{CHCH}_2\text{OP}$ -), 67.4 (- $\text{POCH}_2\text{CH}_2\text{N}$ -), 68.1 (Bn $\text{CH}_2$ -), 129.1 (Ph), 129.3 (Ph), 129.6 (Ph), 137.2 (quaternary carbon in Ph), 171.1 (BnOCO-), 176.5 (- $\text{NHCO}$ -).

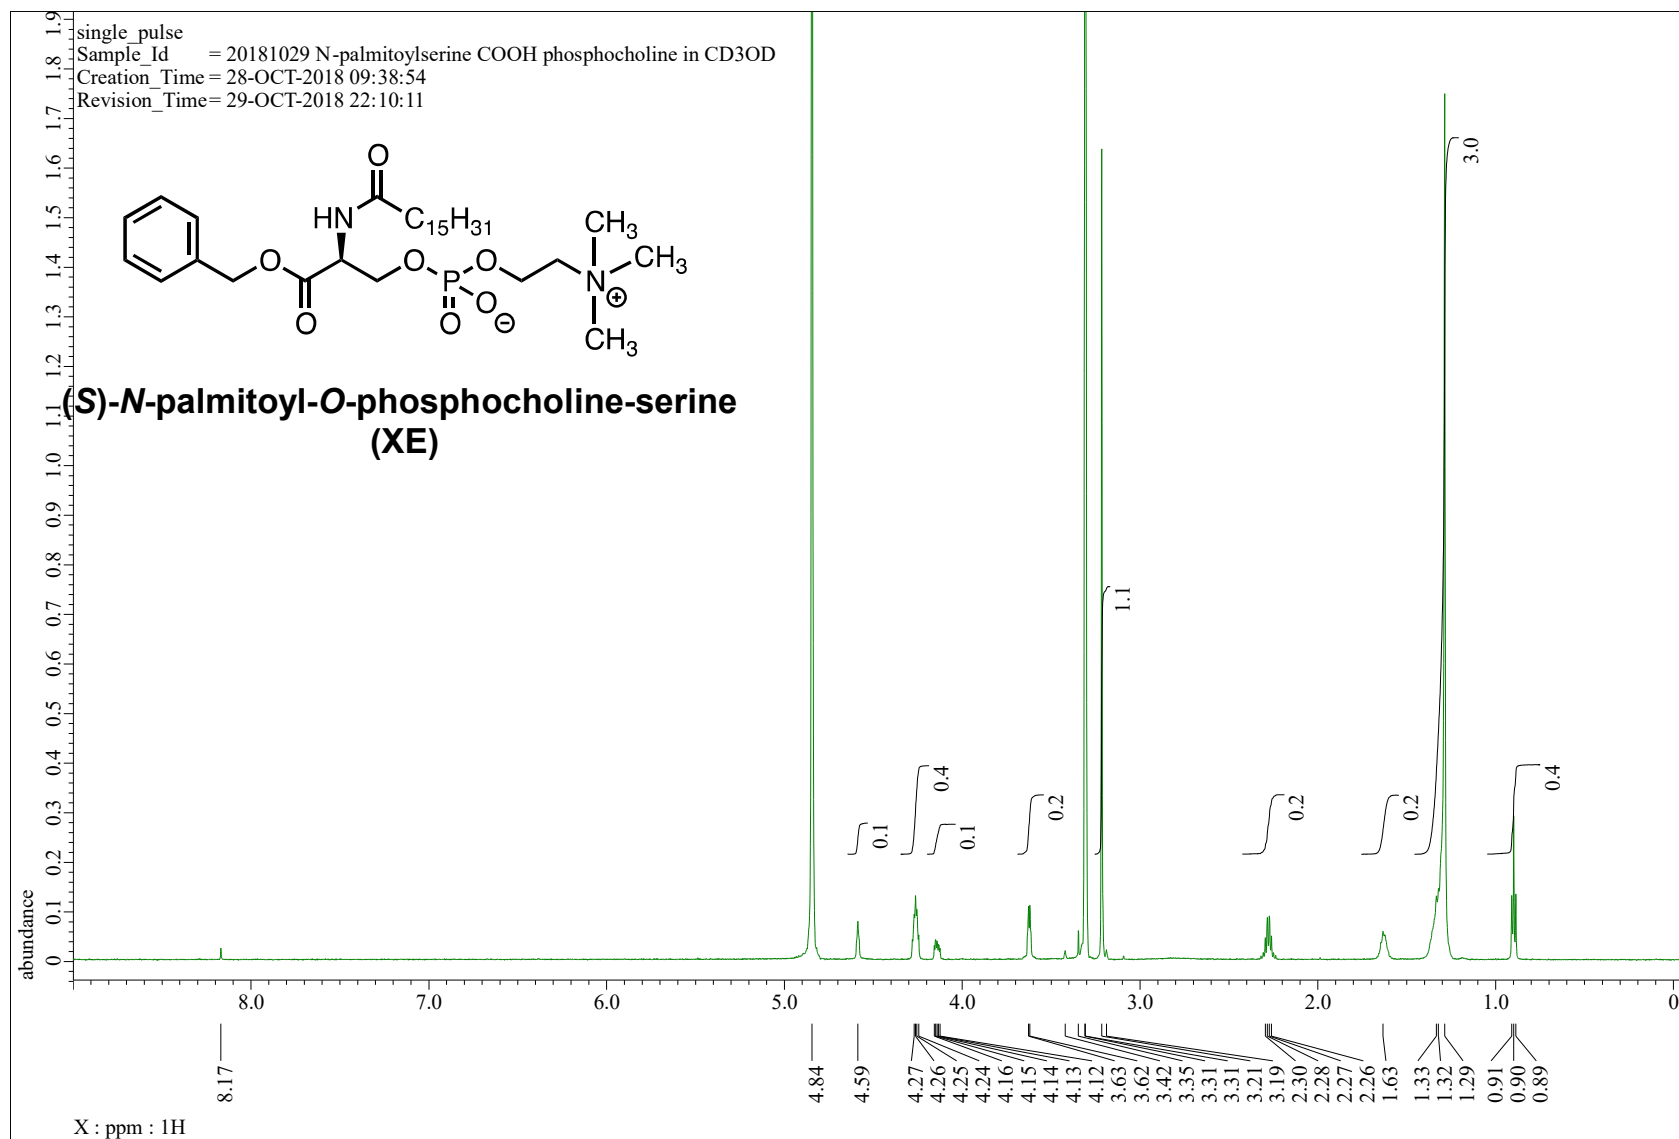

Fig. S3 (continued)

i, <sup>1</sup>H-NMR spectrum of (S)-N-palmitoyl-O-phosphocholine-serine in CD<sub>3</sub>OD.

δ : 0.87 (t, J = 6.9 Hz, 3H, -CH<sub>2</sub>CH<sub>3</sub>), 1.26–1.31 (m, 24H, palmitoyl), 1.61 (s, 2H, NCO-CH<sub>2</sub>-CH<sub>2</sub>), 2.21–2.28 (m, 2H, -NCO-CH<sub>2</sub>), 3.19 (s, 9H, -N(CH<sub>3</sub>)<sub>3</sub>), 3.60 (d, J = 4.8 Hz, 2H, -POCH<sub>2</sub>CH<sub>2</sub>N), 4.10–4.13 (m, 1H, -CHCH<sub>2</sub>OP-), 4.22–4.25 (m, 3H, -CH<sub>2</sub>OP(=O,-OH)OCH<sub>2</sub>), 4.56 (s, 1H, -COCHN-).

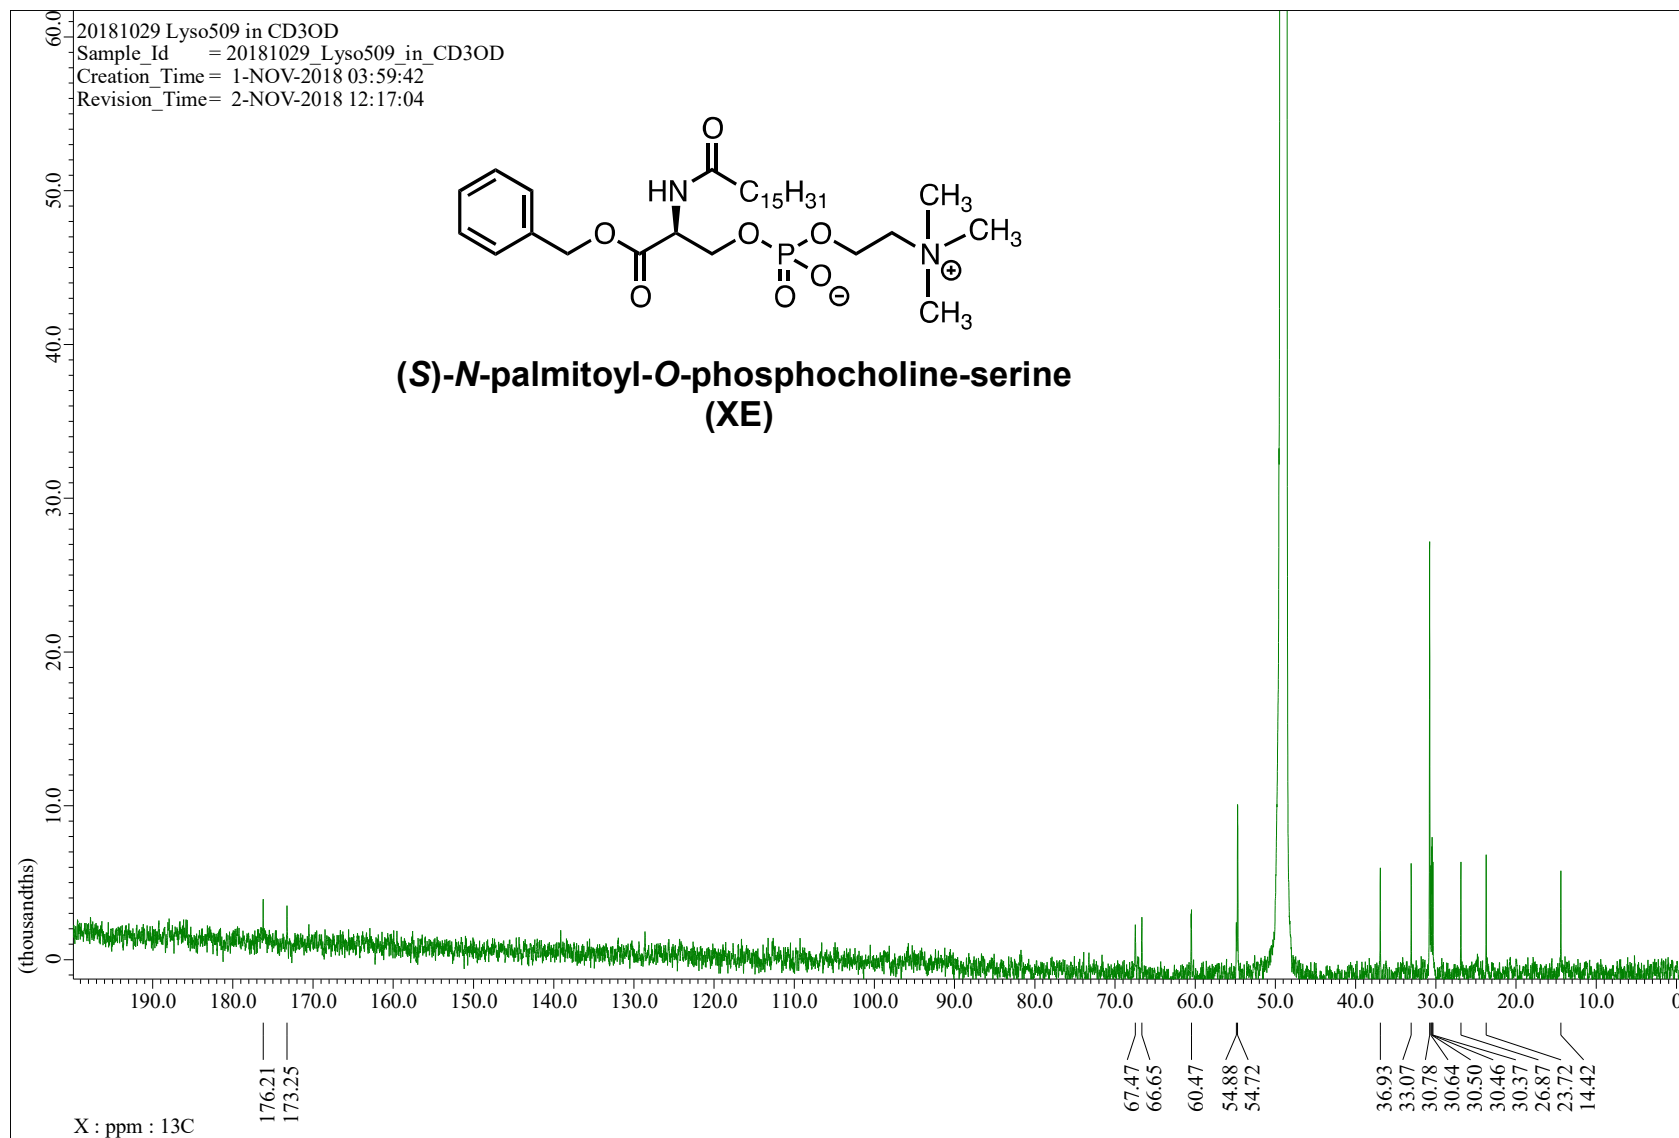

Fig. S3(continued).

j,  $^{13}\text{C}$ -NMR spectrum of (S)-N-palmitoyl-O-phosphocholine-serine in  $\text{CD}_3\text{OD}$ .

$\delta$  : 14.4 (- $\text{CH}_3$ ), 23.7 (- $\text{CH}_2\text{CH}_3$ ), 26.87 (- $\text{NHCOCH}_2\text{CH}_2$ -), 30.4–30.8 (multiple peaks in the range), 33.1(- $\text{CH}_2\text{CH}_2\text{CH}_3$ ), 36.9 (- $\text{NHCOCH}_2$ -), 54.7 (- $\text{NHCH}$ -), 54.9 (- $\text{N}(\text{CH}_3)_2$ -), 60.5 (- $\text{POCH}_2\text{CH}_2$ -), 66.7 (- $\text{CHCH}_2\text{OP}$ -), 67.5 (- $\text{CHCH}_2\text{OP}$ -), 173.3 (- $\text{COOH}$ ), 176.2 (- $\text{NHCO}$ -).

K

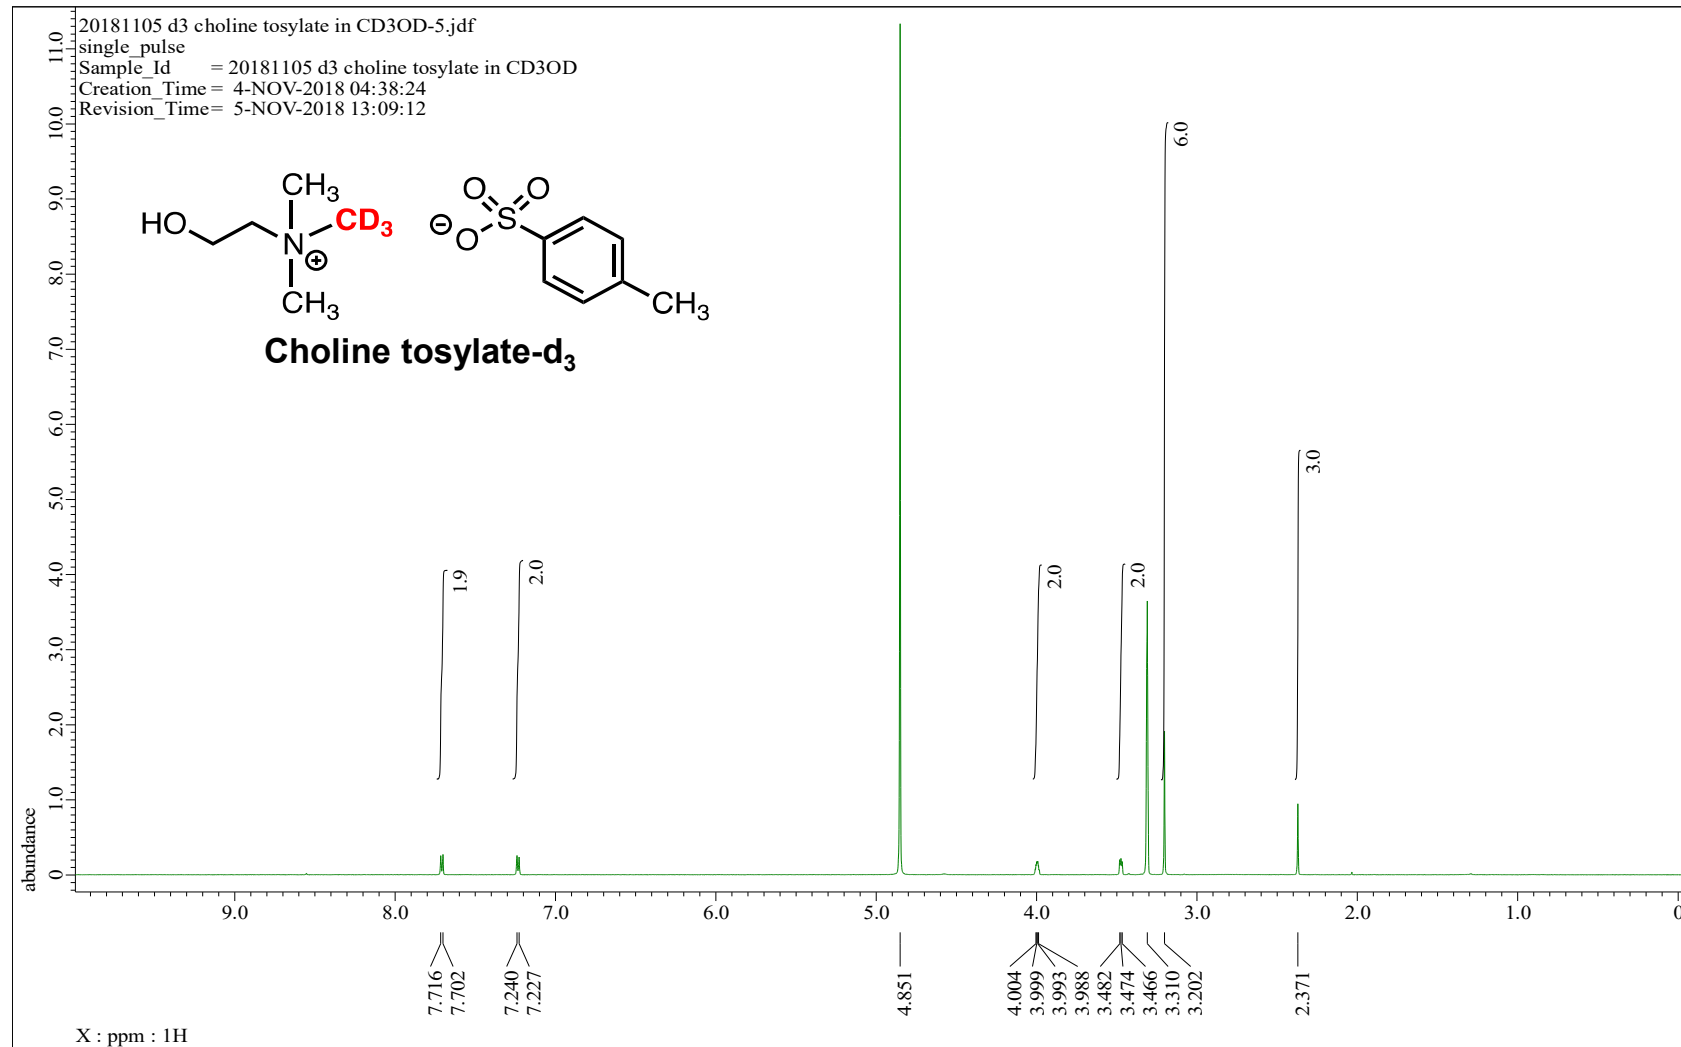

Fig. S3(continued).

k, <sup>1</sup>H-NMR of Choline tosylate-d<sub>3</sub> in CD<sub>3</sub>OD.δ 2.37 (s, 3H, Ar-CH<sub>3</sub>), 3.20 (s, 6H, N(CH<sub>3</sub>)<sub>2</sub>CD<sub>3</sub>), 3.47–3.48 (m, 2H), 3.98–4.01 (m, 2H), 7.23 (d, J = 8.2 Hz, 2H, Ar), 7.71 (d, J = 8.2 Hz, 2H, Ar).

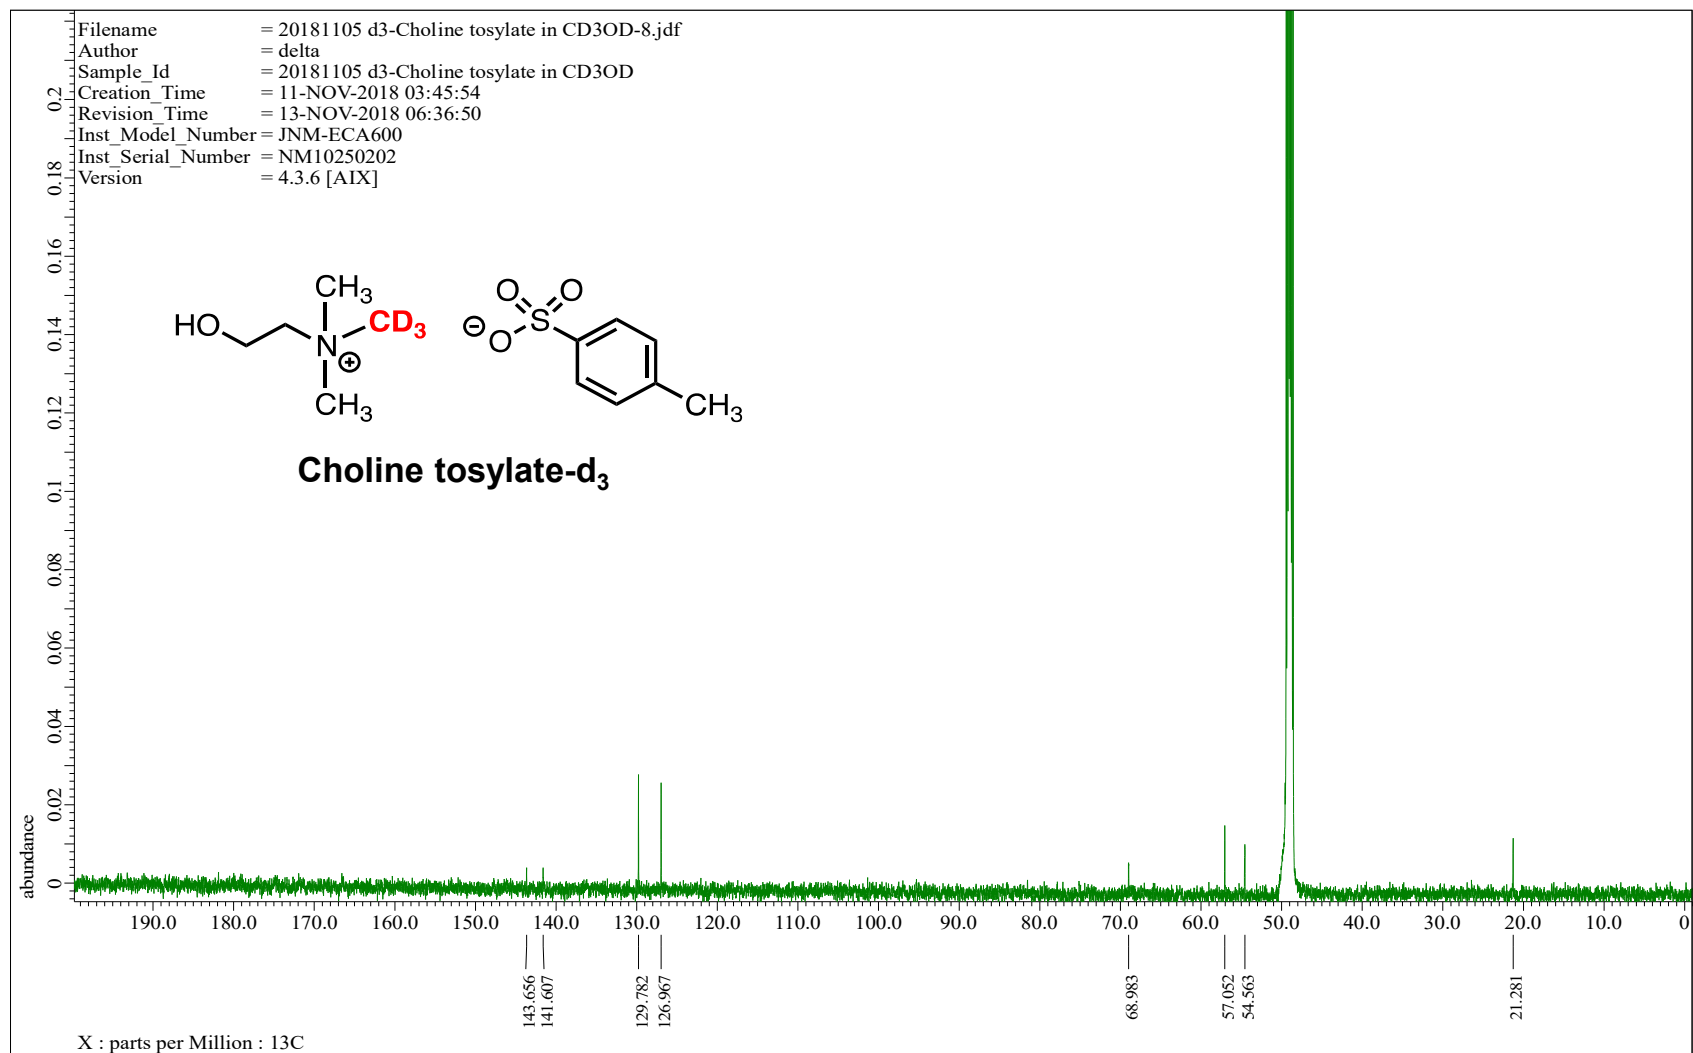

Fig. S3(continued).

I, <sup>13</sup>C-NMR of Choline tosylate-d<sub>3</sub> in CD<sub>3</sub>OD
 $\delta$  21.3 (Ar-CH<sub>3</sub>), 54.6 (N(CH<sub>3</sub>)<sub>2</sub>CD<sub>3</sub>), 57.1 (NCH<sub>2</sub>CH<sub>2</sub>OH), 69.0 (NCH<sub>2</sub>CH<sub>2</sub>OH), 127.0 (CH<sub>3</sub>-C=CH-), 129.8 (CH<sub>3</sub>-C-CH=CH), 141.6 (CH<sub>3</sub>-C), 143.7 (C-S).

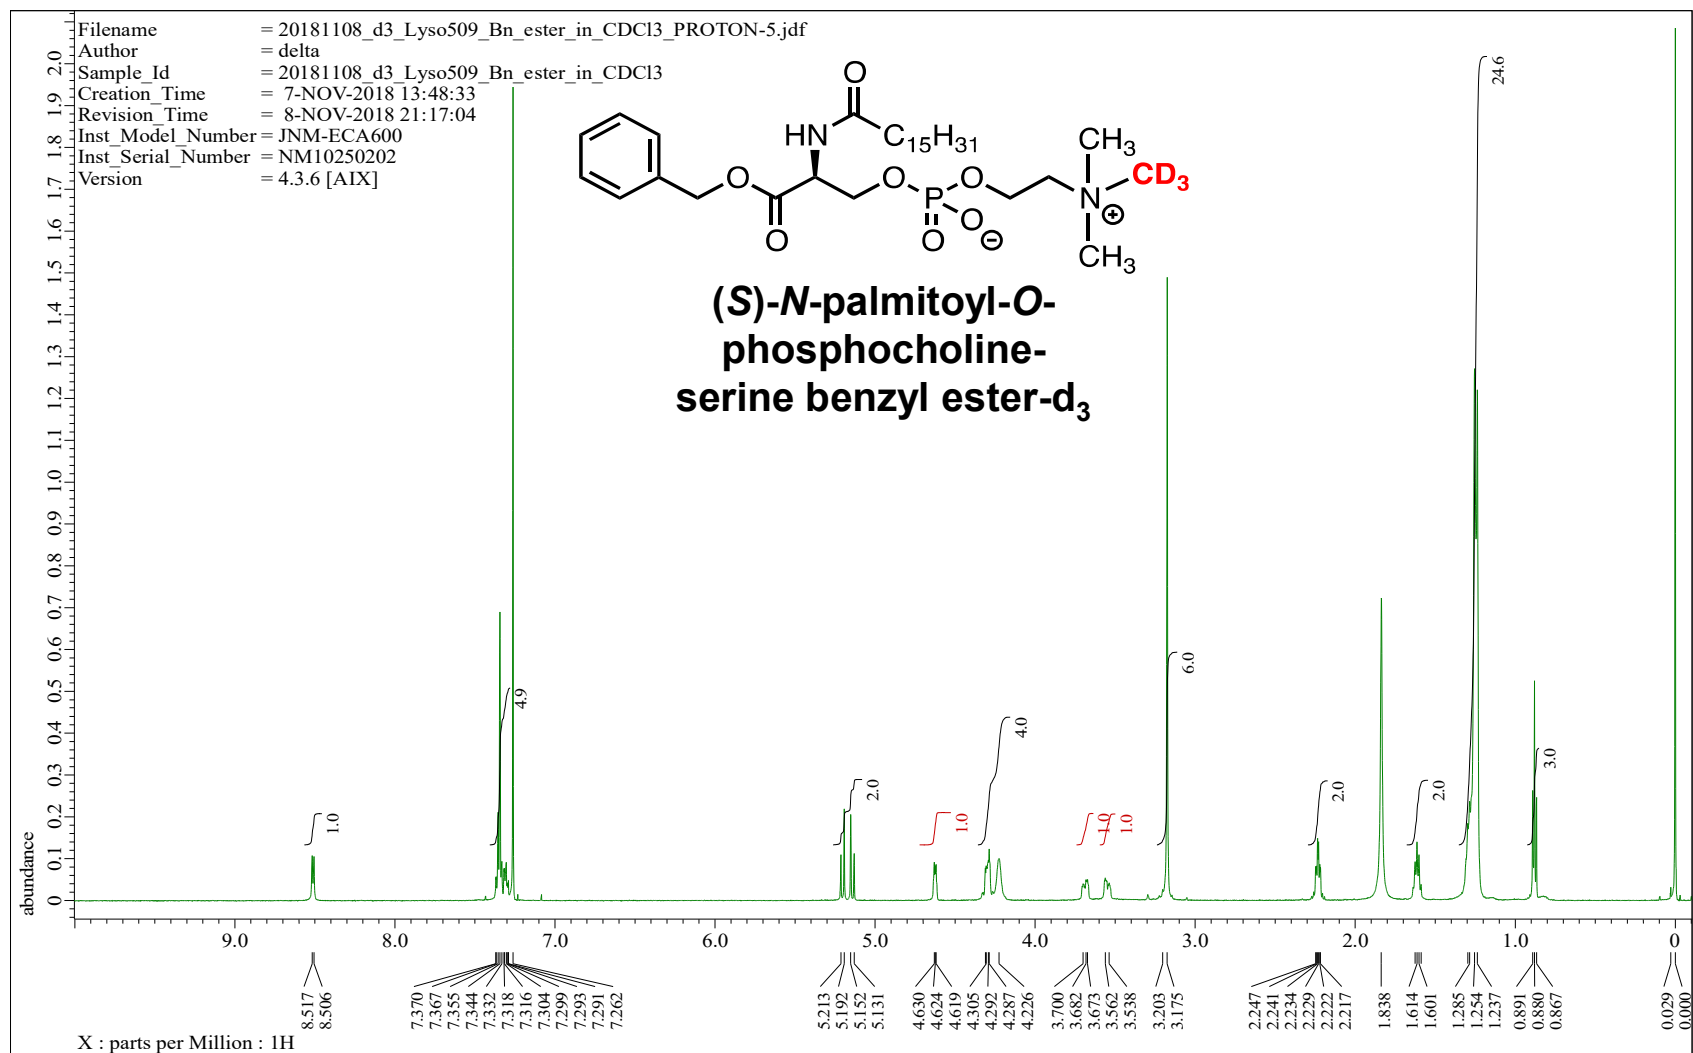

Fig. S3(continued).

m, <sup>1</sup>H-NMR of (S)-N-palmitoyl-O-phosphocholineserine benzyl ester-d<sub>3</sub> in CDCl<sub>3</sub>

δ: 0.88 (t, J = 6.9 Hz, 3H, -CH<sub>3</sub>), 1.24–1.30 (m, 25H, palmitoyl), 1.59–1.64 (m, 2H, -NCOCH<sub>2</sub>CH<sub>2</sub>-), 2.19–2.27 (m, 2H, NCO-CH<sub>2</sub>), 3.18 (s, 6H, -N(CH<sub>3</sub>)<sub>2</sub>-), 3.53–3.58 (m, 1H, -POCH<sub>2</sub>CH<sub>2</sub>N), 3.67–3.71 (m, 1H, -POCH<sub>2</sub>CH<sub>2</sub>N), 4.23–4.31 (m, 4H, -CH<sub>2</sub>OPOCH<sub>2</sub>-), 4.61–4.64 (m, 1H, -COCHN-), 5.17 (dd, J = 36.8, 12.7 Hz, 2H, Bn-CH<sub>2</sub>-OCO), 7.29–7.37 (m, 5H, Bn), 8.51 (d, J = 6.9 Hz, 1H, NH);

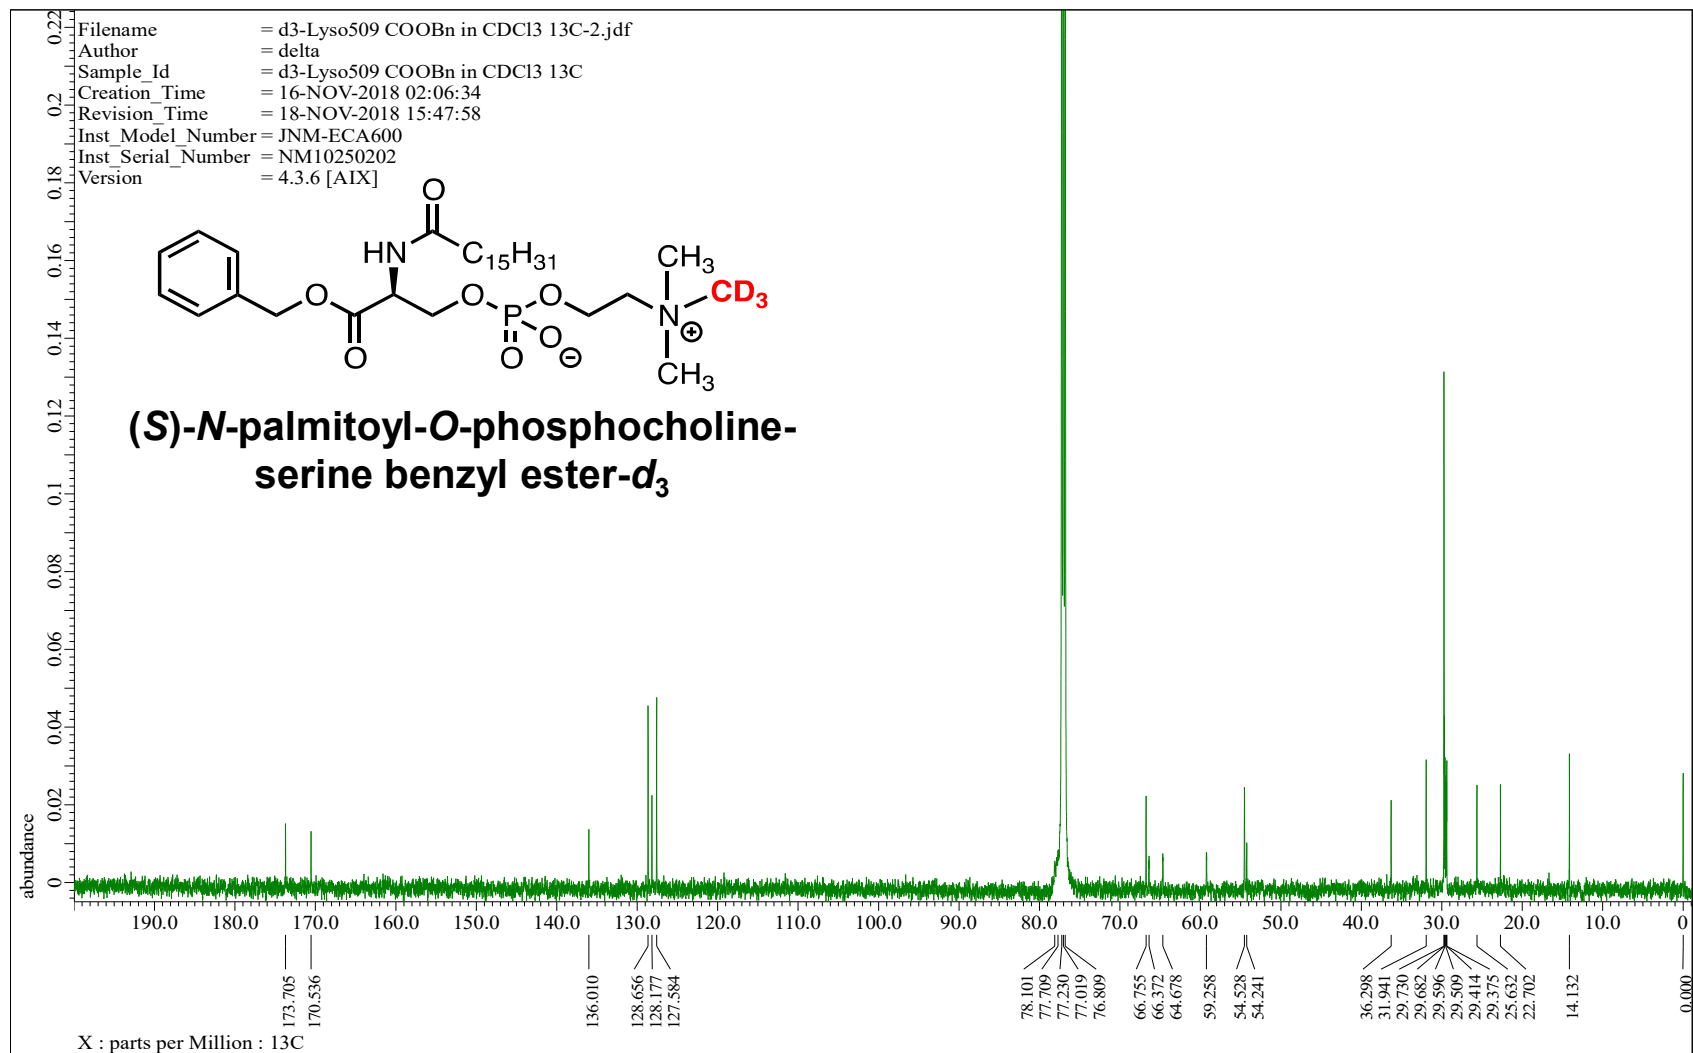

Fig. S3(continued).

$n$ ,  $^{13}\text{C}$ - NMR of (S)-N-palmitoyl-O-phosphocholine-serine benzyl ester- $d_3$  in  $\text{CDCl}_3$

$\delta$ : 14.13 (- $\text{CH}_3$ ), 22.70 (- $\text{CH}_2\text{CH}_3$ ), 25.6 (- $\text{NHCOCH}_2\text{CH}_2$ -), 29.4–29.7 (multiple peaks in the range), 31.9 (- $\text{CH}_2\text{CH}_2\text{CH}_3$ ), 36.3 (- $\text{NHCOCH}_2$ -), 54.2 (- $\text{NHCH}$ -), 54.6 (- $\text{N}(\text{CH}_3)_3$ ), 59.3 (- $\text{POCH}_2\text{CH}_2$ -), 64.7 (- $\text{CHCH}_2\text{OP}$ -), 66.4 (- $\text{POCH}_2\text{CH}_2\text{N}$ -), 66.8 (Bn $\text{CH}_2$ -), 127.6 (Ph), 128.2 (Ph), 128.7 (Ph), 136.0 (quaternary carbon in Ph), 170.5 (BnOCO-), 173.7 (- $\text{NHCO}$ -).



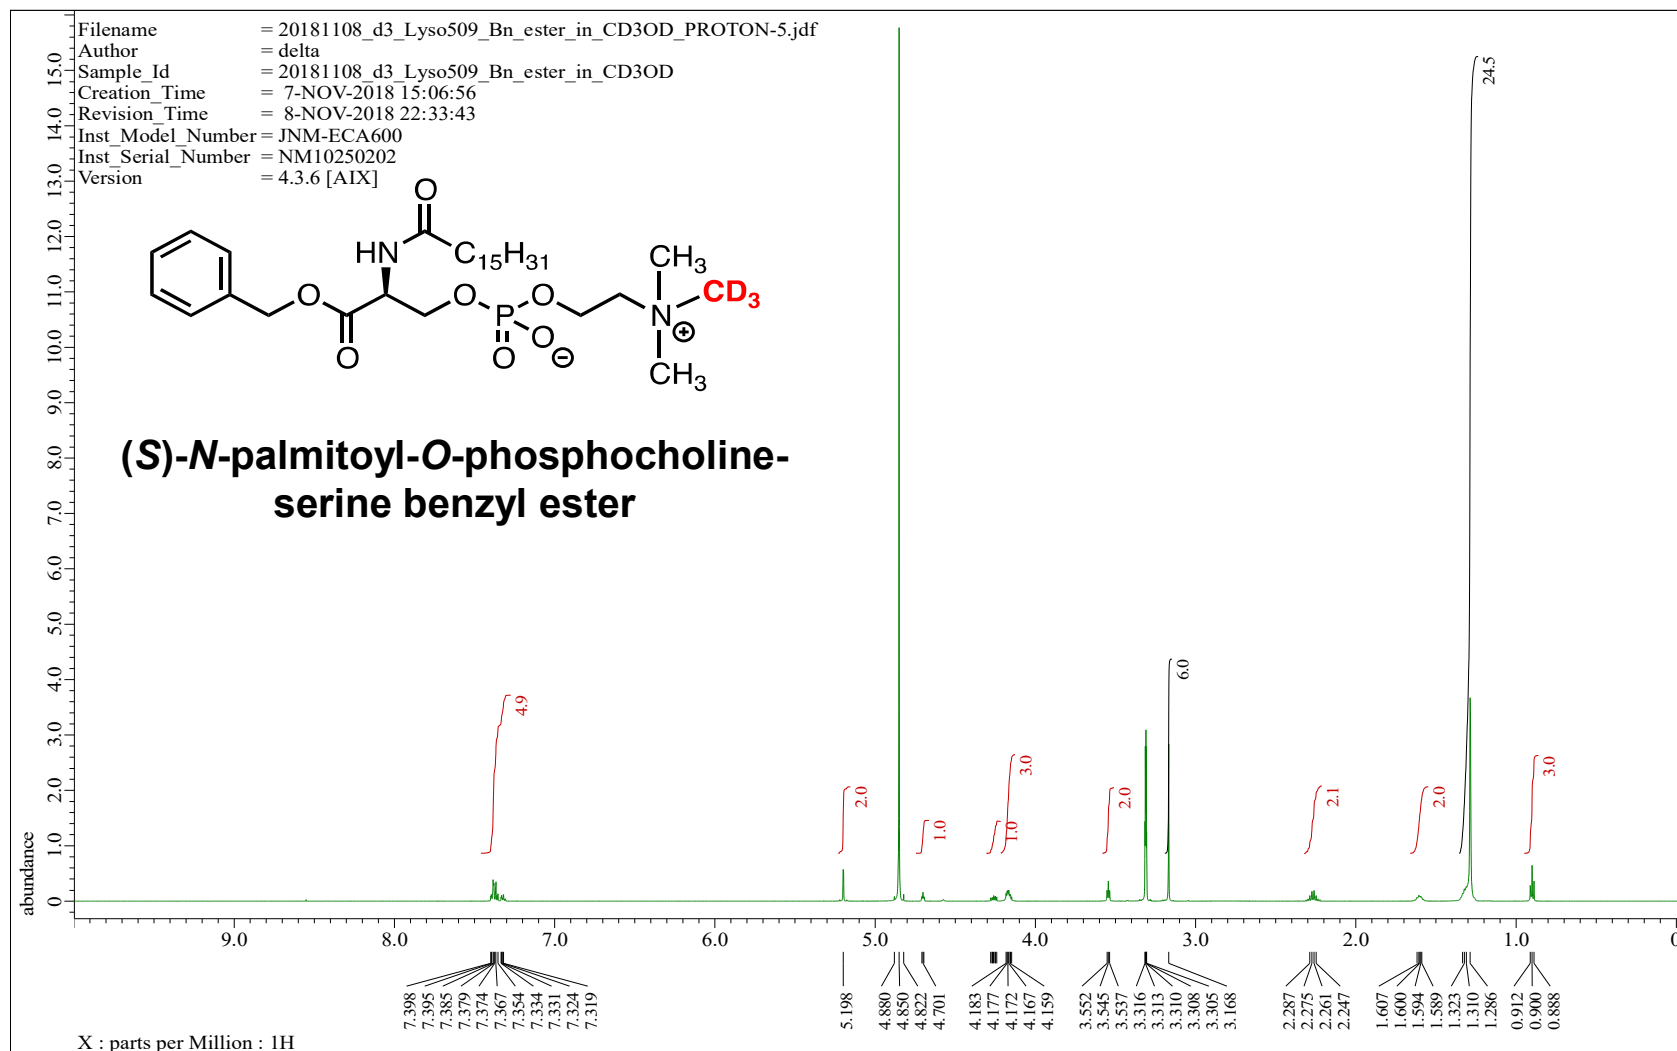

Fig. S3(continued).

**o**, <sup>1</sup>H-NMR of (S)-N-palmitoyl-O-phosphocholineserine benzyl ester in CD<sub>3</sub>OD.

δ: 0.90 (t, J = 6.9 Hz, 3H, CH<sub>3</sub>), 1.29-1.34 (m, 24H, palmitoyl), 1.58-1.64 (m, 2H, NCO-CH<sub>2</sub>-CH<sub>2</sub>), 2.27 (dq, J = 30 Hz, 7.2 Hz, 2H, -NCO-CH<sub>2</sub>), 3.17 (s, 6H, -N(CH<sub>3</sub>)<sub>2</sub>CD<sub>3</sub>), 3.54 (t, J = 4.8 Hz, 2H, -POCH<sub>2</sub>CH<sub>2</sub>N), 4.15-4.18 (m, 3H, -CH<sub>2</sub>OP(=O,-OH)OCH<sub>2</sub>), 4.24-4.28 (m, 1H, -CHCH<sub>2</sub>OP-), 4.58 (s, 0H, NH), 4.70 (t, J = 3.8 Hz, 1H, -COCHN-), 5.20 (t, J = 13.1 Hz, 2H, Ar-CH<sub>2</sub>), 7.31-7.40 (m, 5H, Ar).

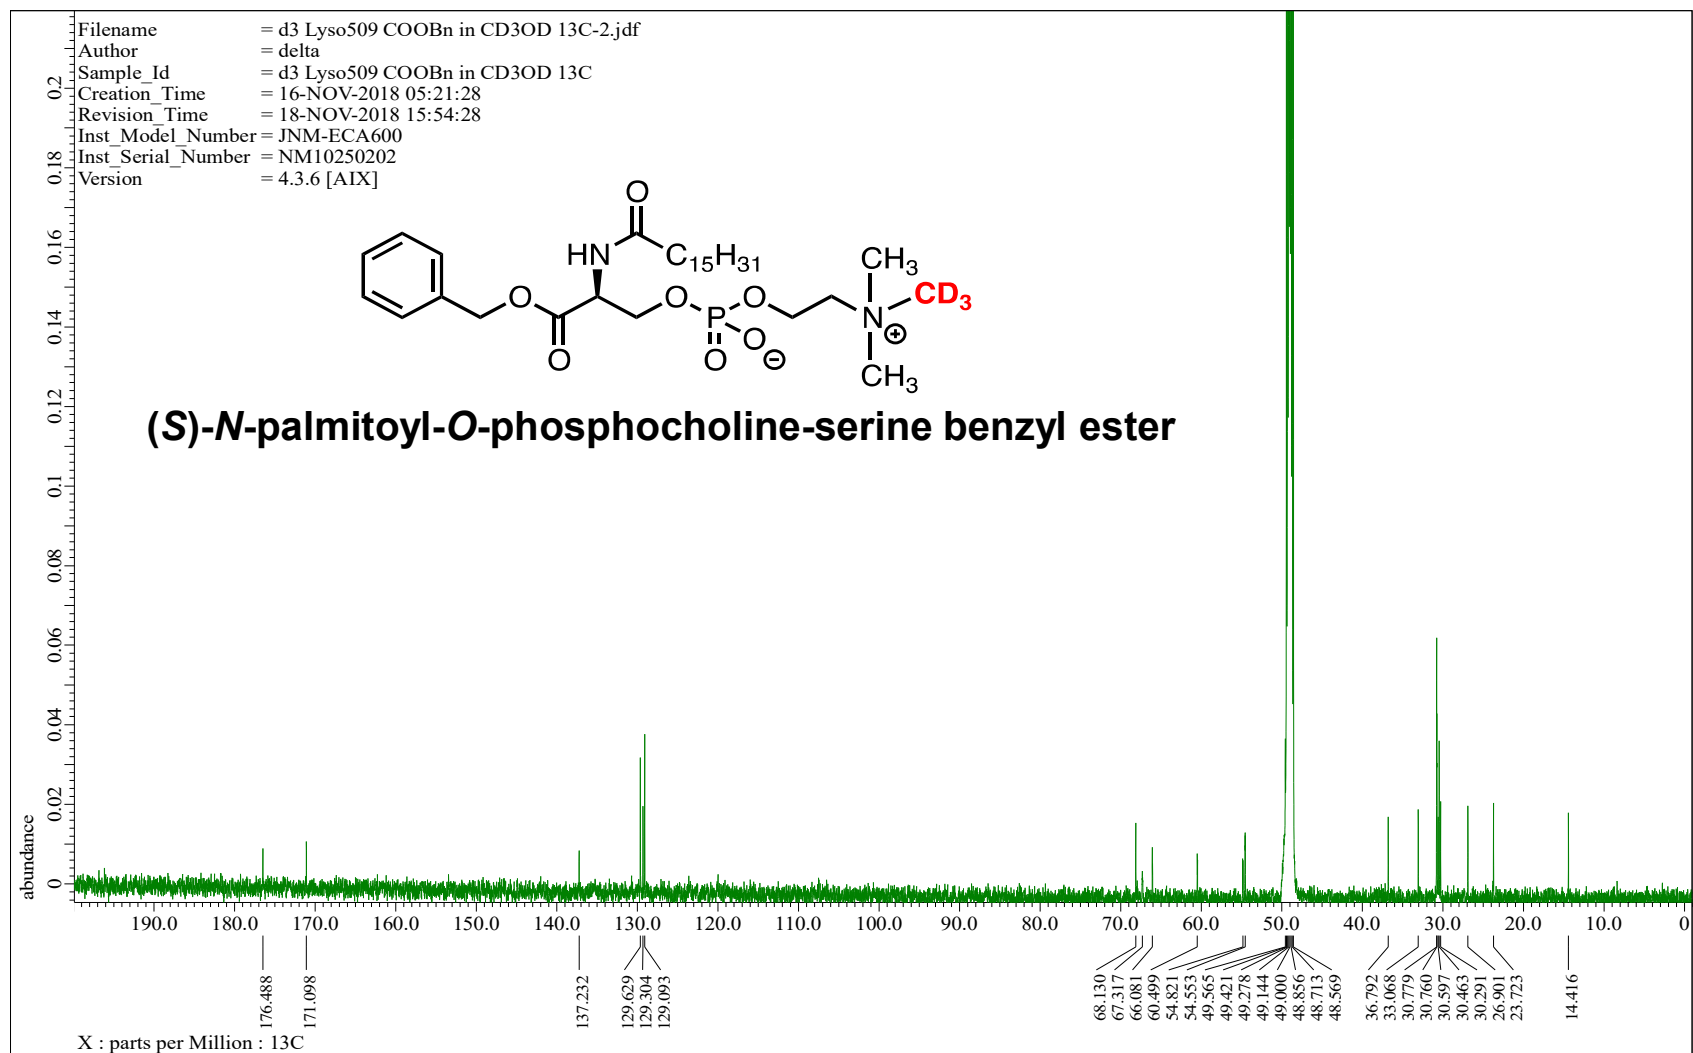

Fig. S3(continued).

$\delta$ ,  $^{13}\text{C}$ -NMR of (S)-N-palmitoyl-O-phosphocholineserine benzyl ester in  $\text{CD}_3\text{OD}$

$\delta$ : 14.1 (- $\text{CH}_3$ ), 22.7 (- $\text{CH}_2\text{CH}_3$ ), 25.6 (- $\text{NHCOCH}_2\text{CH}_2$ -), 29.4-29.7 (multiple peaks in the range), 31.9 (- $\text{CH}_2\text{CH}_2\text{CH}_3$ ), 36.3 (- $\text{NHCOCH}_2$ -), 54.2 (- $\text{N}(\text{CH}_3)_2$ -), 54.5 (- $\text{NHCH}$ -), 59.3 (- $\text{POCH}_2\text{CH}_2$ -), 64.7 (- $\text{CHCH}_2\text{OP}$ -), 66.4 (- $\text{CHCH}_2\text{OP}$ -), 66.8 (- $\text{CHCH}_2\text{OP}$ -), 127.6 (Bn), 128.2 (Bn), 128.7 (Bn), 136.0 (Bn), 170.5 (COOH), 173.7 (NHCO).

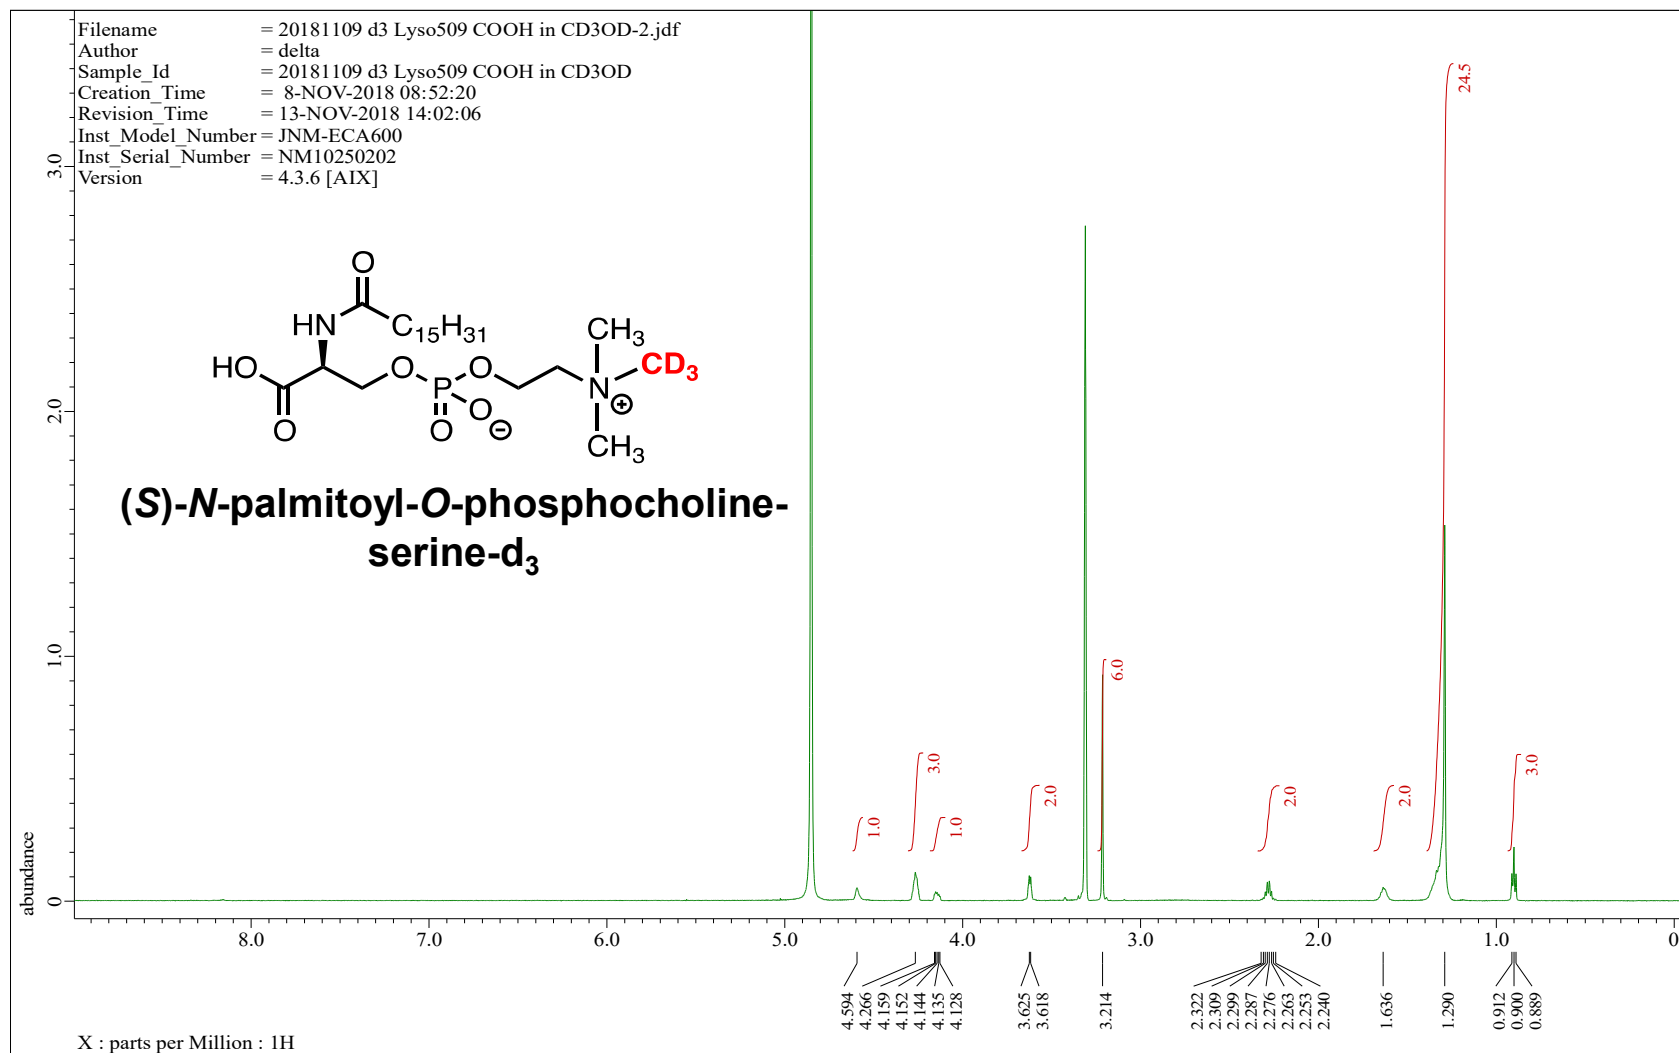

Fig. S3(continued).

q, <sup>1</sup>H-NMR of (S)-N-palmitoyl-O-phosphocholine-serine-d<sub>3</sub> in CD<sub>3</sub>OD

δ: 0.90 (t, J = 6.9 Hz, 3H, CH<sub>3</sub>), 1.29–1.34 (m, 24H, palmitoyl), 1.64 (m, 2H, NCO-CH<sub>2</sub>-CH<sub>2</sub>), 2.24–2.30 (m, 2H, NCO-CH<sub>2</sub>), 3.21 (s, 6H, -N(CH<sub>3</sub>)<sub>2</sub>CD<sub>3</sub>), 3.62 (d, J = 4.1 Hz, 2H, -POCH<sub>2</sub>CH<sub>2</sub>N), 4.13–4.16 (m, 1H, -CHCH<sub>2</sub>OP-), 4.26 (m, 3H, -CH<sub>2</sub>OP(=O,-OH)OCH<sub>2</sub>), 4.59 (s, 1H, -COCHNH-);

R

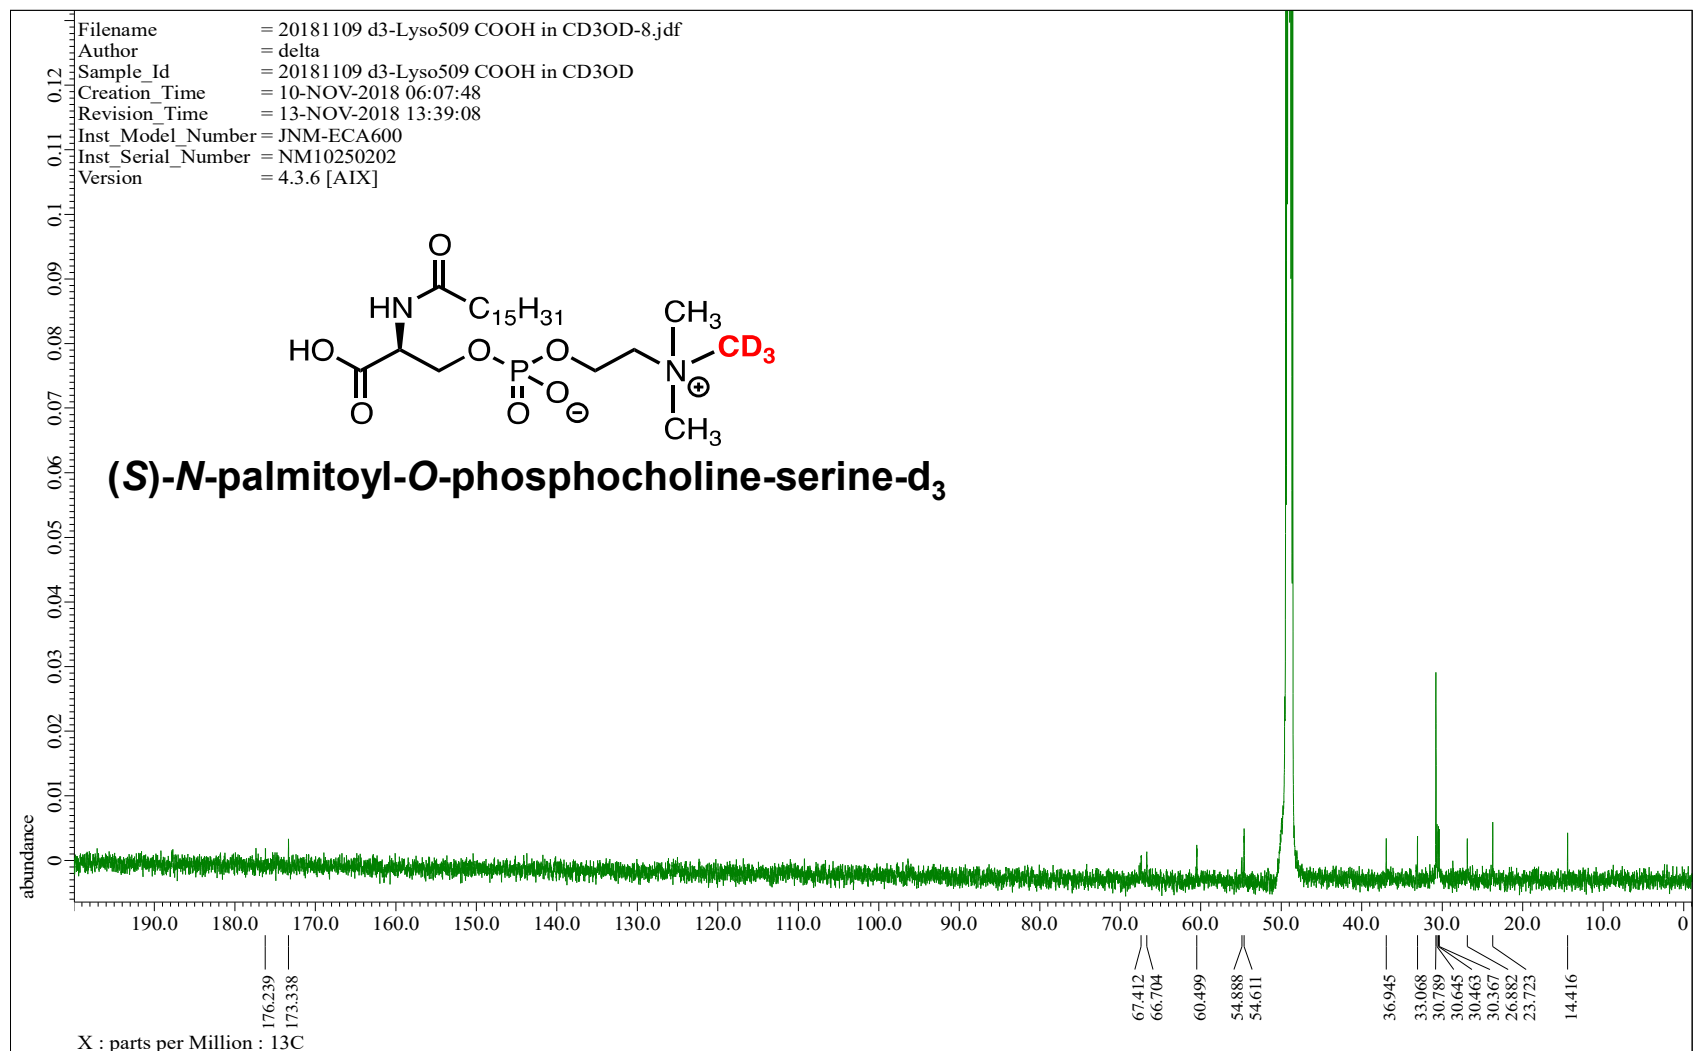

Fig. S3(continued).

<sup>13</sup>C-NMR of (S)-N-palmitoyl-O-phosphocholineserine (Lyso SM 509) in CD<sub>3</sub>OD

δ: 14.4 (-CH<sub>3</sub>), 23.7 (-CH<sub>2</sub>CH<sub>3</sub>), 26.9 (-NHCOCH<sub>2</sub>CH<sub>2</sub>-), 30.4–30.8 (multiple peaks in the range), 33.1 (-CH<sub>2</sub>CH<sub>2</sub>CH<sub>3</sub>), 36.9 (-NHCOCH<sub>2</sub>-), 54.7 (-N(CH<sub>3</sub>)<sub>2</sub>CD<sub>3</sub>), 54.9 (-NHCH-), 60.5 (-POCH<sub>2</sub>CH<sub>2</sub>-), 66.7 (-CHCH<sub>2</sub>OP-), 67.5 (-CHCH<sub>2</sub>OP-), 173.3 (-COOH), 176.2 (-NHCO-).

Table S1 The serum/plasma concentrations of *N*-palmitoyl-*O*-phosphocholine-serine and SPC of patients with NPC and control subjects

| Subject | Gender | Age<br>(years) | Sample | <i>N</i> -Palmitoyl- <i>O</i> -<br>phosphocholine-<br>serine<br>(ng/mL) | SPC<br>(ng/mL) |
|---------|--------|----------------|--------|-------------------------------------------------------------------------|----------------|
| NPC01   | Female | 24             | Serum  | 2560                                                                    | 17.27          |
| NPC02   | Male   | 34             | Serum  | 2010                                                                    | 8.25           |
| NPC03   | Female | 52             | Serum  | 2460                                                                    | 11.8           |
| NPC04   | Female | 26             | Serum  | 1080                                                                    | 8.11           |
| NPC05   | Female | 21             | Serum  | 1560                                                                    | 7.5            |
| NPC06   | Female | 18             | Serum  | 2410                                                                    | 12.57          |
| NPC07   | Female | 11             | Serum  | 3160                                                                    | 11.56          |
| NPC08   | Male   | 2.5            | Serum  | 2510                                                                    | 8.11           |
| NPC09   | Male   | 0.8            | Serum  | 1790                                                                    | 7.75           |
| NPC10   | Male   | 0.3            | Serum  | 2270                                                                    | 17.51          |
| NPC11   | Female | 11             | Serum  | 3030                                                                    | 13.19          |
| NPC12   | Male   | 48             | Serum  | 1920                                                                    | 12.66          |
| NPC13   | Female | 30             | Serum  | 1040                                                                    | 9.91           |
| NPC14   | Male   | 1.5            | Serum  | 3410                                                                    | 17.2           |
| NPC15   | Male   | 28             | Serum  | 9440                                                                    | 6.78           |
| GAU01   | Male   | 19             | Serum  | 22.5                                                                    | 4.55           |
| GAU02   | Male   | 16             | Serum  | 12.3                                                                    | 2.86           |
| GAU03   | Male   | 21             | Serum  | 8.77                                                                    | 5.79           |
| HUN01   | Male   | 18             | Serum  | 35.9                                                                    | 4.29           |
| HUN02   | Male   | 8              | Serum  | 14.4                                                                    | 2.06           |
| POP01   | Female | 23             | Serum  | 15.7                                                                    | 3.29           |
| NPS01   | Female | 26             | Serum  | 7.35                                                                    | 3.67           |
| NPS02   | Female | 0.0833         | Serum  | 38.1                                                                    | 1.8            |
| NPS03   | Female | 51             | Serum  | 7.99                                                                    | 3.88           |
| NPS04   | Male   | 11             | Serum  | 33.7                                                                    | 1.89           |
| NPS05   | Male   | 1.5            | Serum  | 7.87                                                                    | 2.55           |
| NPS06   | Male   | 37             | Serum  | 34.6                                                                    | 2.47           |
| NPS07   | Female | 52             | Serum  | 644                                                                     | 6.87           |
| NPS08   | Female | 45             | Serum  | 9.77                                                                    | 3.64           |
| NPS09   | Male   | 42             | Serum  | 9.89                                                                    | 5.54           |

M. Maekawa, I. Jinnoh, Y. Matsumoto, *et al.*, Table S1

|       |        |       |       |      |      |
|-------|--------|-------|-------|------|------|
| NPS10 | Female | 33    | Serum | 22.7 | 3.66 |
| NPS11 | Female | 46    | Serum | 11.6 | 2.51 |
| NPS12 | Female | 8     | Serum | 14.6 | 3.77 |
| NPS13 | Female | 0.056 | Serum | 17.2 | 2.46 |
| NPS14 | Female | 23    | Serum | 12.7 | 4.07 |
| NPS15 | Female | 24    | Serum | 10.3 | 4.11 |
| NPS16 | Female | 7     | Serum | 17.7 | 4.53 |
| NPS17 | Female | 36    | Serum | 40.3 | 2.04 |
| NPS18 | Female | 0.5   | Serum | 27.2 | 3.34 |
| NPS19 | Female | 19    | Serum | 55.5 | 2.2  |
| NPS20 | Female | 12    | Serum | 11.9 | 3.47 |
| NPS21 | Female | 15    | Serum | 14.0 | 3.8  |
| NPS22 | Female | 34    | Serum | 8.85 | 4.2  |
| NPS23 | Male   | 43    | Serum | 28.3 | 5.03 |
| NPS24 | Female | 52    | Serum | 14.2 | 2.33 |
| NPS25 | Male   | 2     | Serum | 16.2 | 3.45 |
| NPS26 | Female | 42    | Serum | 23.1 | 3.17 |
| NPS27 | Female | 57    | Serum | 18.3 | 2.26 |
| NPS28 | Male   | 14    | Serum | 14.9 | 3.87 |
| NPS29 | Male   | 17    | Serum | 11.5 | 4.44 |
| NPS30 | Male   | 61    | Serum | 64.5 | 3.91 |
| NPS31 | Male   | 3     | Serum | 4.36 | 2.34 |
| NPS32 | Female | 39    | Serum | 15.6 | 3.06 |
| NPS33 | Male   | 14    | Serum | 19.1 | 3.68 |
| NPS34 | Male   | 48    | Serum | 16.2 | 3.64 |
| NPS35 | Male   | 17    | Serum | 12.2 | 3.17 |
| NPS36 | Female | 5     | Serum | 10.6 | 1.96 |
| NPS37 | Male   | 32    | Serum | 10.4 | 2.22 |
| NPS38 | Female | 69    | Serum | 17.6 | 3.29 |
| NPS39 | Female | 58    | Serum | 29.4 | 4.47 |
| NPS40 | Female | 11    | Serum | 8.21 | 2.7  |
| NPS41 | Male   | 54    | Serum | 63.9 | 4.38 |
| NPS42 | Female | 39    | Serum | 10.6 | 4.14 |
| NPS43 | Female | 14    | Serum | 11.5 | 3.16 |
| HC01  | Male   | 21    | Serum | 11.3 | 3.86 |
| HC02  | Male   | 22    | Serum | 20.7 | 5.16 |

M. Maekawa, I. Jinnoh, Y. Matsumoto, *et al.*, Table S1

|      |      |    |        |      |      |
|------|------|----|--------|------|------|
| HC03 | Male | 23 | Serum  | 10.4 | 3.93 |
| HC04 | Male | 23 | Plasma | 6.37 | 3.18 |
| HC05 | Male | 24 | Plasma | 7.96 | 2.37 |
| HC06 | Male | 24 | Plasma | 11.0 | 1.76 |
| HC07 | Male | 24 | Plasma | 9.80 | 2.27 |
| HC08 | Male | 25 | Plasma | 11.3 | 2.48 |
| HC09 | Male | 26 | Plasma | 10.6 | 2.28 |
| HC10 | Male | 26 | Plasma | 6.54 | 2.09 |
| HC11 | Male | 26 | Plasma | 25.0 | 3.59 |
| HC12 | Male | 27 | Plasma | 21.2 | 2.69 |
| HC13 | Male | 27 | Plasma | 14.6 | 2.53 |
| HC14 | Male | 27 | Plasma | 16.6 | 2.01 |
| HC15 | Male | 27 | Plasma | 11.6 | 2.32 |
| HC16 | Male | 28 | Plasma | 12.4 | 2.1  |
| HC17 | Male | 29 | Serum  | 14.4 | 4.82 |
| HC18 | Male | 30 | Plasma | 13.7 | 3.36 |
| HC19 | Male | 30 | Plasma | 17.6 | 2.9  |
| HC20 | Male | 30 | Plasma | 25.5 | 3.5  |

---

GAU, patient with Gaucher disease; HC, healthy control; HUN, patient with Hunter disease; NPC, patient with Niemann-Pick disease type C; NPS, patients suspected for NPC but were not determined the mutations of *NPCI* and *NPC2*. POP, patient with Pompe disease.

Table S2 MS/MS parameters in selected reaction monitoring analysis for simultaneous quantitation.

| No | Compound                                                                    | Target    | Q1<br>( <i>m/z</i> ) | Q3<br>( <i>m/z</i> ) | DP<br>(V) | EP<br>(V) | CE<br>(V) | CXP<br>(V) |
|----|-----------------------------------------------------------------------------|-----------|----------------------|----------------------|-----------|-----------|-----------|------------|
| 1  | <i>N</i> -Palmitoyl- <i>O</i> -phosphocholine-serine                        | Analyte 1 | 509.3                | 184.0                | 91        | 12        | 31        | 18         |
| 2  | <i>N</i> -Palmitoyl- <i>O</i> -phosphocholine-serine- <i>d</i> <sub>3</sub> | IS 1      | 512.3                | 184.0                | 91        | 12        | 31        | 18         |
| 3  | SPC                                                                         | Analyte 2 | 465.3                | 184.0                | 86        | 2         | 35        | 12         |
| 4  | Lyso-SM (d17:1)                                                             | IS 2      | 451.3                | 184.0                | 86        | 2         | 35        | 12         |

CE, collision energy; CXP, collision cell exit potential; DP, declustering potential; EP, entrance potential; SPC, sphingosylphosphorylcholine (also called as Lyso-SM (d18:1)); *nor*-SPC, *nor*-sphingosylphosphorylcholine (also called as Lyso-SM (d17:1)); IS, internal standard.



Table S3 Analytical method validation.

## (A) Matrix factor.

| Target    | Compound                                                            | Matrix factor (%) |      | IS normalized matrix factor (%) |       |
|-----------|---------------------------------------------------------------------|-------------------|------|---------------------------------|-------|
|           |                                                                     | LQC               | HQC  | LQC                             | HQC   |
| Analyte 1 | <i>N</i> -Palmitoyl- <i>O</i> -phosphocholine-serine                | 94.6              | 97.5 | 90.0                            | 99.9  |
| IS 1      | <i>N</i> -Palmitoyl- <i>O</i> -phosphocholine-serine-d <sub>3</sub> | 105               | 97.6 |                                 |       |
| Analyte 2 | SPC                                                                 | 102.5             | 99.1 | 98.2                            | 100.1 |
| IS 2      | Lyso-SM (d17:1)                                                     | 104.3             | 99.0 |                                 |       |

$$\text{Matrix factor (\%)} = \frac{(\text{Peak area of spiked serum}) - (\text{peak area of blank serum})}{(\text{Peak area of standard solution})} \times 100$$

$$\text{IS normalized matrix factor (\%)} = \frac{(\text{Matrix factor of each analytes})}{(\text{Matrix factor of IS})} \times 100$$

Analyte 1 was normalized with IS 1 and Analyte 2 was normalized with IS 2.

## (B) Calibration curve.

| Compound                                             | Quantification range<br>(ng/mL) | Regression equation | Correlation coefficient |
|------------------------------------------------------|---------------------------------|---------------------|-------------------------|
| <i>N</i> -Palmitoyl- <i>O</i> -phosphocholine-serine | 1–4000                          | y=0.00108x+0.00446  | 0.9974                  |
| SPC                                                  | 1–4000                          | y=0.00085x+0.000177 | 0.9922                  |

(C) Intra-assay and inter-assay reproducibility in serum.

|                                                      | Precision (%) |       |       |       | Accuracy (%) |        |       |
|------------------------------------------------------|---------------|-------|-------|-------|--------------|--------|-------|
|                                                      | Blank         | LQC   | MQC   | HQC   | LQC          | MQC    | HQC   |
| Intra-day assay                                      |               |       |       |       |              |        |       |
| <i>N</i> -Palmitoyl- <i>O</i> -phosphocholine-serine | 2.27          | 0.670 | 1.57  | 0.997 | -3.45        | -0.610 | -7.54 |
| SPC                                                  | 3.07          | 1.79  | 2.02  | 2.62  | -2.13        | -0.3   | 1.3   |
| Inter-day assay                                      |               |       |       |       |              |        |       |
| Compound                                             |               |       |       |       |              |        |       |
| <i>N</i> -Palmitoyl- <i>O</i> -phosphocholine-serine | 1.50          | 1.35  | 0.400 | 0.399 | -4.17        | -1.25  | -6.49 |
| SPC                                                  | 2.06          | 0.516 | 0.189 | 0.937 | -2.95        | -0.923 | 1.98  |

Precision was evaluated as relative standard deviation (R.S.D.).

$$\text{R.S.D. (\%)} = \frac{(\text{Standard deviation})}{(\text{Mean concentration})} \times 100$$

Recovery was evaluated as relative error (R.E.).

$$\text{R.E. (\%)} = \frac{(\text{Calculated concentration}) - ((\text{Added concentration}) + (\text{Blank concentration}))}{(\text{Added concentration}) + (\text{Blank concentration})} \times 100$$

LQC, low quality control (2 ng/mL); MQC, middle quality control (80 ng/mL); HQC, high quality control (3000 ng/mL) .

## (D) Stability test in serum.

|                                                      | Recovery (% Mean±SD)                                 |            |                      |           |              |            |
|------------------------------------------------------|------------------------------------------------------|------------|----------------------|-----------|--------------|------------|
|                                                      | Freeze and thaw                                      |            | -80°C for 1 week     |           | 4°C for 24 h |            |
|                                                      | LQC                                                  | HQC        | LQC                  | HQC       | LQC          | HQC        |
| <i>N</i> -Palmitoyl- <i>O</i> -phosphocholine-serine | 104±0.26                                             | 99.1±0.681 | 101±2.47             | 97.6±1.05 | 100±0.134    | 95.7±0.935 |
| SPC                                                  | 102±2.80                                             | 97.1±1.97  | 98.2±1.66            | 96.9±2.43 | 99.4±1.45    | 97.1±2.64  |
|                                                      | 24°C for 12 h                                        |            | Autosampler for 48 h |           |              |            |
|                                                      | LQC                                                  | HQC        | LQC                  | HQC       |              |            |
|                                                      | <i>N</i> -Palmitoyl- <i>O</i> -phosphocholine-serine | 105±2.08   | 97.1±4.39            | 105±1.56  | 92.9±0.442   |            |
| SPC                                                  | 103±1.48                                             | 96.3±4.05  | 107±2.08             | 101±1.02  |              |            |

LQC, low quality control (2 ng/mL); HQC, high quality control (3000 ng/mL).

## (E) Intra-assay and inter-assay reproducibility in plasma.

|                                                      | Precision (%) |       |        |       | Accuracy (%) |        |       |
|------------------------------------------------------|---------------|-------|--------|-------|--------------|--------|-------|
|                                                      | Blank         | LQC   | MQC    | HQC   | LQC          | MQC    | HQC   |
| Intra-day assay                                      |               |       |        |       |              |        |       |
| <i>N</i> -Palmitoyl- <i>O</i> -phosphocholine-serine | 2.27          | 0.670 | 1.57   | 0.997 | -3.45        | -0.610 | -7.54 |
| SPC                                                  | 3.07          | 1.79  | 0.917  | 1.92  | -2.13        | 11.7   | 17.5  |
| Inter-day assay                                      |               |       |        |       |              |        |       |
| Compound                                             |               |       |        |       |              |        |       |
| <i>N</i> -Palmitoyl- <i>O</i> -phosphocholine-serine | 1.50          | 1.35  | 0.400  | 0.399 | -4.17        | -1.25  | -6.49 |
| SPC                                                  | 2.06          | 0.516 | 0.0741 | 0.399 | -2.95        | 12.4   | 18.9  |

Precision was evaluated as relative standard deviation (R.S.D.).

$$\text{R.S.D. (\%)} = \frac{(\text{Standard deviation})}{(\text{Mean concentration})} \times 100$$

Recovery was evaluated as relative error (R.E.).

$$\text{R.E. (\%)} = \frac{(\text{Calculated concentration}) - ((\text{Added concentration}) + (\text{Blank concentration}))}{(\text{Added concentration}) + (\text{Blank concentration})} \times 100$$

LQC, low quality control (2 ng/mL); MQC, middle quality control (80 ng/mL); HQC, high quality control (3000 ng/mL).

## (F) Stability test in plasma.

|                                                      | Recovery (% Mean±SD)                                 |           |                      |           |              |           |
|------------------------------------------------------|------------------------------------------------------|-----------|----------------------|-----------|--------------|-----------|
|                                                      | Freeze and thaw                                      |           | -80°C for 1 week     |           | 4°C for 24 h |           |
|                                                      | LQC                                                  | HQC       | LQC                  | HQC       | LQC          | HQC       |
| <i>N</i> -Palmitoyl- <i>O</i> -phosphocholine-serine | 110±1.36                                             | 101±1.63  | 110±4.76             | 101±1.28  | 108±2.63     | 96.3±4.55 |
| SPC                                                  | 101±1.63                                             | 101±0.833 | 100±2.95             | 102±0.453 | 103±3.86     | 102±2.49  |
|                                                      | 24°C for 12 h                                        |           | Autosampler for 48 h |           |              |           |
|                                                      | LQC                                                  | HQC       | LQC                  | HQC       |              |           |
|                                                      | <i>N</i> -Palmitoyl- <i>O</i> -phosphocholine-serine | 109±2.26  | 99.0±2.03            | 112±3.77  | 93.9±3.26    |           |
| SPC                                                  | 96.7±1.89                                            | 100±1.81  | 101±1.83             | 101±3.05  |              |           |

LQC, low quality control (2 ng/mL); HQC, high quality control (3000 ng/mL).

Table S4 MS/MS conditions for targeted lipidomics analysis.

| Compound                     | Q1<br>( <i>m/z</i> ) | Retention time<br>(min) | IS                           |
|------------------------------|----------------------|-------------------------|------------------------------|
| Lyso-PC (14:0)               | 468.3                | 22.2                    | NAOPCS (16:0)-d <sub>3</sub> |
| Lyso-PC (16:1)               | 494.3                | 23.5                    | NAOPCS (16:0)-d <sub>3</sub> |
| Lyso-PC (16:0)               | 496.3                | 26.2                    | NAOPCS (16:0)-d <sub>3</sub> |
| Lyso-PC (18:1)               | 522.4                | 27.2                    | NAOPCS (16:0)-d <sub>3</sub> |
| Lyso-PC (18:0)               | 524.4                | 29.7                    | NAOPCS (16:0)-d <sub>3</sub> |
| Lyso-PC (20:1)               | 550.4                | 30.4                    | NAOPCS (16:0)-d <sub>3</sub> |
| Lyso-PC (20:0)               | 552.4                | 33.0                    | NAOPCS (16:0)-d <sub>3</sub> |
| SPC                          | 465.3                | 19.2                    | <i>nor</i> -SPC              |
| NAOPCS (14:0)                | 481.3                | 19.3                    | NAOPCS (16:0)-d <sub>3</sub> |
| NAOPCS (16:0)                | 509.3                | 23.5                    | NAOPCS (16:0)-d <sub>3</sub> |
| NAOPCS (18:0)                | 537.4                | 27.19                   | NAOPCS (16:0)-d <sub>3</sub> |
| NAOPCS (20:0)                | 565.4                | 30.62                   | NAOPCS (16:0)-d <sub>3</sub> |
| <i>nor</i> -SPC              | 451.3                | 16.95                   | NAOPCS (16:0)-d <sub>3</sub> |
| NAOPCS (16:0)-d <sub>3</sub> | 512.3                | 23.53                   | NAOPCS (16:0)-d <sub>3</sub> |

Lyso-PC, lysophosphatidylcholine; NAOPCS, *N*-acyl-*O*-phosphocholine-serine, SPC, sphingosylphosphorylcholine (also called as lyso-sphingomyelin (d18:1)); *nor*-SPC, *nor*-sphingosylphosphorylcholine (also called as lyso-sphingomyelin (d17:1))
